# Supplementary material for: Fruit and vegetable consumption in adolescence and early adulthood and risk of breast cancer: population based cohort study
Source: PubMed Central journal article supplement — BMJ. 2016 May 11;353:i2343. doi: 10.1136/bmj.i2343 (PMC5068921; doi:10.1136/bmj.i2343), 2016-05-11
Supplement: farm030130.ww1_default.pdf [file farm030130.ww1_default.pdf]

**Appendix: Supplemental tables (posted as supplied by author)**

**Table A: Definitions for early adulthood various fruit and vegetable subgroups based on individual items in 1991 FFQ**

| <b>Sub-groups</b>                        | <b>Individual foods</b>                                                                                                                                                                                                                                                                                                                                                                                                                                                                                                                                                                                                                                                                                                                                          |
|------------------------------------------|------------------------------------------------------------------------------------------------------------------------------------------------------------------------------------------------------------------------------------------------------------------------------------------------------------------------------------------------------------------------------------------------------------------------------------------------------------------------------------------------------------------------------------------------------------------------------------------------------------------------------------------------------------------------------------------------------------------------------------------------------------------|
| Total Fruits                             | Raisins (2 tbsps.), prunes (1/2 cup), banana (1 small), cantaloupe (1 cup), apple/pear (1), orange (1 small), grapefruit (1/2), strawberries (1 ¼ cup), blueberries (3/4 cup), peach/apricot/plum (1/2 cup)                                                                                                                                                                                                                                                                                                                                                                                                                                                                                                                                                      |
| Fruit juice                              | apple juice/cider (1/2 cup), orange juice (1/2 cup), grapefruit juice (1/2 cup), other fruit juices (1/2 cup)                                                                                                                                                                                                                                                                                                                                                                                                                                                                                                                                                                                                                                                    |
| Total vegetables                         | Raw spinach (1 cup), cooked spinach (1/2 cup), iceberg or head lettuce (1 cup), romaine or leaf lettuce (1 cup), raw carrots (1 large), cooked carrots (1/2 cup), beet (cooked, 1/2 cup), yam/sweet potato (cooked, 1/2 cup), dark orange squash (cooked, 1/2 cup), tomatoes (1 medium), tomatoes juice (1/2 cup), tomato sauce (1/3 cup), salsa (1/2 cup), broccoli (cooked, 1/2 cup), cabbage/Cole slaw (cooked, 1/2 cup), cauliflower (cooked, 1/2 cup), brussels sprouts (cooked, 1/2 cup), kale/mustard/chard greens (cooked, 1/2 cup), corn (cooked, 1/2 cup), mixed vegetables (cooked, 1/2 cup), eggplant/zucchini/other summer squash (cooked, 1/2 cup), celery (1 cup), green pepper (1/2 cup), onion (1/2 cup), green beans (1/2 cup), peas (1/2 cup) |
| Green leafy vegetables                   | Raw spinach, cooked spinach, iceberg or head lettuce, romaine or leaf lettuce                                                                                                                                                                                                                                                                                                                                                                                                                                                                                                                                                                                                                                                                                    |
| Yellow/orange vegetables                 | Raw carrots, cooked carrots, yam or sweet potato, dark orange squash                                                                                                                                                                                                                                                                                                                                                                                                                                                                                                                                                                                                                                                                                             |
| Tomato                                   | Tomatoes, tomatoes juice, tomato sauce, salsa                                                                                                                                                                                                                                                                                                                                                                                                                                                                                                                                                                                                                                                                                                                    |
| Cruciferous vegetables                   | Broccoli, cabbage/Cole slaw, cauliflower, brussels sprouts, kale/mustard/chard greens                                                                                                                                                                                                                                                                                                                                                                                                                                                                                                                                                                                                                                                                            |
| Other vegetables                         | Corn, mixed vegetables, eggplant or zucchini or other summer squash, celery, green pepper, onion, beet, green beans, peas                                                                                                                                                                                                                                                                                                                                                                                                                                                                                                                                                                                                                                        |
| Vitamin C rich fruit and vegetables      | Cantaloupe, orange, grapefruit, strawberries, Broccoli, cabbage/Cole slaw, cauliflower, brussels sprouts, kale/mustard/chard greens, green peppers                                                                                                                                                                                                                                                                                                                                                                                                                                                                                                                                                                                                               |
| Alpha carotene rich fruit and vegetables | Raw carrots, cooked carrots                                                                                                                                                                                                                                                                                                                                                                                                                                                                                                                                                                                                                                                                                                                                      |
| Beta carotene rich fruit and vegetables  | Raw carrots, cooked carrots, yams, raw spinach, cooked spinach, lettuce, kale/mustard/chard greens                                                                                                                                                                                                                                                                                                                                                                                                                                                                                                                                                                                                                                                               |
| Lutein rich fruit and vegetables         | Raw spinach, cooked spinach, kale/mustard/chard greens                                                                                                                                                                                                                                                                                                                                                                                                                                                                                                                                                                                                                                                                                                           |
| Citrus fruits                            | Orange, grapefruit                                                                                                                                                                                                                                                                                                                                                                                                                                                                                                                                                                                                                                                                                                                                               |
| Berries                                  | Strawberries, blueberries                                                                                                                                                                                                                                                                                                                                                                                                                                                                                                                                                                                                                                                                                                                                        |
| Pomes                                    | Apple/pear                                                                                                                                                                                                                                                                                                                                                                                                                                                                                                                                                                                                                                                                                                                                                       |
| Drupes                                   | Peach/apricot/plum, prunes                                                                                                                                                                                                                                                                                                                                                                                                                                                                                                                                                                                                                                                                                                                                       |
| Tropical fruits                          | Banana                                                                                                                                                                                                                                                                                                                                                                                                                                                                                                                                                                                                                                                                                                                                                           |
| Grapes                                   | Raisins                                                                                                                                                                                                                                                                                                                                                                                                                                                                                                                                                                                                                                                                                                                                                          |
| Melon                                    | Cantaloupe                                                                                                                                                                                                                                                                                                                                                                                                                                                                                                                                                                                                                                                                                                                                                       |

**Table B: Definitions for adolescent various fruit and vegetable subgroups based on individual items in HS-FFQ**

| <b>Sub-groups</b>                        | <b>Individual foods</b>                                                                                                                                                                                                                                                                                                                                                                                                                                           |
|------------------------------------------|-------------------------------------------------------------------------------------------------------------------------------------------------------------------------------------------------------------------------------------------------------------------------------------------------------------------------------------------------------------------------------------------------------------------------------------------------------------------|
| Total Fruits                             | Raisins (2 tbsps.), grapes (1/2 cup), banana (1 small), cantaloupe/melon (1 cup), apple (1 small), apple sauce (1/2 cup), pear (1/2 large), orange/grapefruit (1), strawberries (1 ¼ cup), peach/apricot/plum (1/2 cup), pineapple (canned, 1/2 cup)                                                                                                                                                                                                              |
| Fruit juice                              | Apple juice (1/2 cup), orange juice (1/2 cup), other fruit juices (1/2 cup)                                                                                                                                                                                                                                                                                                                                                                                       |
| Total vegetables                         | Raw spinach (1 cup), cooked spinach (1/2 cup), lettuce (1 cup), tomatoes (1 medium), tomato sauce (1/3 cup), broccoli/Brussels sprouts (cooked, 1/2 cup), cabbage/Coleslaw (cooked, 1/2 cup), cauliflower (cooked, 1/2 cup), mustard/kale/chard greens (cooked, 1/2 cup), corn (cooked, 1/2 cup), eggplant/zucchini/other summer squash (cooked, 1/2 cup), celery (1 cup), green pepper (1/2 cup), onion (1/2 cup), green beans (1/2 cup), peas (1/2 cup), radish |
| Green leafy vegetables                   | Raw spinach, cooked spinach, lettuce                                                                                                                                                                                                                                                                                                                                                                                                                              |
| Yellow/orange vegetables                 | Raw carrots, cooked carrots, yam/sweet potato                                                                                                                                                                                                                                                                                                                                                                                                                     |
| Tomato                                   | Tomatoes, tomato sauce,                                                                                                                                                                                                                                                                                                                                                                                                                                           |
| Cruciferous vegetables                   | broccoli/Brussels sprouts, cabbage/Cole slaw, cauliflower, mustard/kale/chard greens                                                                                                                                                                                                                                                                                                                                                                              |
| Other vegetables                         | Corn, eggplant/zucchini/other summer squash, celery, green pepper, onion, green beans, peas, radish                                                                                                                                                                                                                                                                                                                                                               |
| Vitamin C rich fruit and vegetables      | Cantaloupe/melon, orange/grapefruit, strawberries, pineapple, broccoli/Brussels sprouts, cabbage/Cole slaw, cauliflower, mustard/kale/chard greens, green pepper                                                                                                                                                                                                                                                                                                  |
| Alpha carotene rich fruit and vegetables | Raw carrots, cooked carrots                                                                                                                                                                                                                                                                                                                                                                                                                                       |
| Beta carotene rich fruit and vegetables  | Raw carrots, cooked carrots, yams, raw spinach, cooked spinach, lettuce, mustard/kale/chard greens                                                                                                                                                                                                                                                                                                                                                                |
| Lutein rich fruit and vegetables         | Raw spinach, cooked spinach, kale/mustard/chard greens                                                                                                                                                                                                                                                                                                                                                                                                            |
| Citrus fruits                            | Orange/grapefruit                                                                                                                                                                                                                                                                                                                                                                                                                                                 |
| Berries                                  | Strawberries                                                                                                                                                                                                                                                                                                                                                                                                                                                      |
| Pomes                                    | Apple, apple sauce, pear                                                                                                                                                                                                                                                                                                                                                                                                                                          |
| Drupes                                   | Peach/apricot/plum                                                                                                                                                                                                                                                                                                                                                                                                                                                |
| Tropical fruits                          | Banana, pineapple                                                                                                                                                                                                                                                                                                                                                                                                                                                 |
| Grapes                                   | Raisins, grapes                                                                                                                                                                                                                                                                                                                                                                                                                                                   |
| Melon                                    | Cantaloupe/melon                                                                                                                                                                                                                                                                                                                                                                                                                                                  |

**Table C. Hazard ratio (HR) and 95% confidence intervals (95% CI) for breast cancer according to quintile of intake of fruits and vegetable during adolescence among women in the Nurses' Health Study II**

|                                          | Quintile of intake |                  |                  |                  |                  | <i>P</i> <sub>trend</sub> |
|------------------------------------------|--------------------|------------------|------------------|------------------|------------------|---------------------------|
|                                          | 1                  | 2                | 3                | 4                | 5                |                           |
| <b>Adolescent total fruit intake</b>     |                    |                  |                  |                  |                  |                           |
| All cases                                |                    |                  |                  |                  |                  |                           |
| Median intake, serving/day               | 0.5                | 0.9              | 1.4              | 1.9              | 2.9              |                           |
| No. of cases/person-years                | 315/134,534        | 263/134,375      | 250/134,590      | 272/134,414      | 247/134,576      |                           |
| Model 2+ dietary fiber                   | 1                  | 0.84 (0.71-1.00) | 0.80 (0.67-0.96) | 0.87 (0.72-1.06) | 0.80 (0.64-0.99) | 0.14                      |
| Model 2+ vitamin C                       | 1                  | 0.80 (0.68-0.95) | 0.74 (0.62-0.89) | 0.78 (0.65-0.94) | 0.70 (0.57-0.86) | 0.006                     |
| Model 2+Beta-carotene                    | 1                  | 0.81 (0.69-0.96) | 0.76 (0.63-0.90) | 0.81 (0.68-0.97) | 0.74 (0.61-0.91) | 0.02                      |
| Model 2+ animal fat                      | 1                  | 0.82 (0.69-0.97) | 0.76 (0.64-0.90) | 0.82 (0.69-0.97) | 0.74 (0.62-0.90) | 0.01                      |
| Model 2+red meat                         | 1                  | 0.82 (0.69-0.97) | 0.77 (0.64-0.91) | 0.83 (0.70-0.98) | 0.76 (0.63-0.92) | 0.02                      |
| Model 2+AHEI                             | 1                  | 0.82 (0.69-0.97) | 0.77 (0.64-0.91) | 0.82 (0.69-0.98) | 0.75 (0.62-0.91) | 0.02                      |
| Premenopausal cases                      |                    |                  |                  |                  |                  |                           |
| Median intake, serving/day               | 0.5                | 0.9              | 1.4              | 1.9              | 2.9              |                           |
| No. of cases/person-years                | 135/69,408         | 105/69,528       | 123/69,429       | 104/69,505       | 109/69,518       |                           |
| Model 2+ dietary fiber                   | 1                  | 0.81 (0.62-1.06) | 0.93 (0.71-1.22) | 0.83 (0.61-1.12) | 0.90 (0.64-1.26) | 0.74                      |
| Model 2+ vitamin C                       | 1                  | 0.76 (0.58-0.99) | 0.83 (0.64-1.10) | 0.71 (0.53-0.96) | 0.74 (0.54-1.01) | 0.11                      |
| Model 2+Beta-carotene                    | 1                  | 0.78 (0.59-1.01) | 0.87 (0.67-1.13) | 0.76 (0.57-1.00) | 0.81 (0.60-1.10) | 0.29                      |
| Model 2+ animal fat                      | 1                  | 0.79 (0.61-1.02) | 0.88 (0.68-1.14) | 0.77 (0.59-1.01) | 0.83 (0.62-1.10) | 0.28                      |
| Model 2+red meat                         | 1                  | 0.79 (0.61-1.02) | 0.89 (0.69-1.15) | 0.77 (0.59-1.01) | 0.83 (0.63-1.10) | 0.29                      |
| Model 2+AHEI                             | 1                  | 0.79 (0.61-1.03) | 0.90 (0.70-1.17) | 0.79 (0.60-1.04) | 0.84 (0.63-1.11) | 0.33                      |
| Postmenopausal cases                     |                    |                  |                  |                  |                  |                           |
| Median intake, serving/day               | 0.5                | 0.9              | 1.3              | 1.9              | 2.9              |                           |
| No. of cases/person-years                | 149/53,265         | 134/53,368       | 108/53,454       | 138/53,178       | 111/53,219       |                           |
| Model 2+ dietary fiber                   | 1                  | 0.89 (0.69-1.13) | 0.72 (0.55-0.94) | 0.92 (0.70-1.22) | 0.76 (0.55-1.05) | 0.22                      |
| Model 2+ vitamin C                       | 1                  | 0.85 (0.67-1.09) | 0.67 (0.51-0.88) | 0.83 (0.63-1.09) | 0.67 (0.49- 91)  | 0.03                      |
| Model 2+Beta-carotene                    | 1                  | 0.85 (0.66-1.08) | 0.66 (0.51-0.86) | 0.83 (0.64-1.07) | 0.67 (0.50-0.90) | 0.03                      |
| Model 2+ animal fat                      | 1                  | 0.86 (0.68-1.09) | 0.68 (0.52-0.87) | 0.85 (0.66-1.09) | 0.68 (0.51-0.89) | 0.02                      |
| Model 2+red meat                         | 1                  | 0.86 (0.67-1.09) | 0.67 (0.52-0.87) | 0.84 (0.66-1.08) | 0.69 (0.53-0.91) | 0.03                      |
| Model 2+AHEI                             | 1                  | 0.85 (0.67-1.08) | 0.67 (0.51-0.86) | 0.83 (0.65-1.07) | 0.67 (0.51-0.89) | 0.02                      |
| <b>Adolescent total vegetable intake</b> |                    |                  |                  |                  |                  |                           |
| All cases                                |                    |                  |                  |                  |                  |                           |
| Median intake, serving/day               | 1.2                | 1.8              | 2.4              | 3.2              | 4.5              |                           |
| No. of cases/person-years                | 310/134,501        | 255/134,513      | 248/134,563      | 264/134,493      | 270/134,419      |                           |
| Model 2+ dietary fiber                   | 1                  | 0.85 (0.72-1.01) | 0.85 (0.70-1.02) | 0.92 (0.75-1.12) | 0.96 (0.76-1.20) | 0.89                      |
| Model 2+ vitamin C                       | 1                  | 0.82 (0.69-0.97) | 0.78 (0.65-0.93) | 0.82 (0.68-0.99) | 0.83 (0.68-1.02) | 0.22                      |

|                                                    |             |                  |                  |                  |                  |      |
|----------------------------------------------------|-------------|------------------|------------------|------------------|------------------|------|
| Model 2+Beta-carotene                              | 1           | 0.81 (0.68-0.96) | 0.77 (0.63-0.94) | 0.81 (0.66-1.00) | 0.84 (0.65-1.07) | 0.42 |
| Model 2+ animal fat                                | 1           | 0.82 (0.69-0.97) | 0.79 (0.66-0.94) | 0.83 (0.70-0.99) | 0.85 (0.71-1.02) | 0.21 |
| Model 2+red meat                                   | 1           | 0.82 (0.69-0.97) | 0.79 (0.66-0.94) | 0.83 (0.70-0.99) | 0.85 (0.71-1.02) | 0.23 |
| Model 2+AHEI                                       | 1           | 0.82 (0.69-0.97) | 0.79 (0.67-0.94) | 0.84 (0.70-1.00) | 0.86 (0.71-1.03) | 0.27 |
| <b>Premenopausal cases</b>                         |             |                  |                  |                  |                  |      |
| Median intake, serving/day                         | 1.2         | 1.8              | 2.4              | 3.2              | 4.5              |      |
| No. of cases/person-years                          | 138/69,460  | 110/69,410       | 111/69,487       | 99/69,487        | 118/69,544       |      |
| Model 2+ dietary fiber                             | 1           | 0.83 (0.64-1.08) | 0.87 (0.66-1.15) | 0.79 (0.58-1.08) | 0.96 (0.68-1.36) | 0.99 |
| Model 2+ vitamin C                                 | 1           | 0.79 (0.61-1.03) | 0.79 (0.60-1.03) | 0.69 (0.52-0.92) | 0.80 (0.59-1.08) | 0.20 |
| Model 2+Beta-carotene                              | 1           | 0.77 (0.59-1.01) | 0.77 (0.57-1.04) | 0.69 (0.49-0.96) | 0.83 (0.57-1.22) | 0.55 |
| Model 2+ animal fat                                | 1           | 0.81 (0.62-1.05) | 0.82 (0.63-1.06) | 0.72 (0.55-0.95) | 0.86 (0.65-1.13) | 0.35 |
| Model 2+red meat                                   | 1           | 0.80 (0.62-1.04) | 0.82 (0.63-1.06) | 0.72 (0.54-0.94) | 0.85 (0.65-1.12) | 0.31 |
| Model 2+AHEI                                       | 1           | 0.81 (0.63-1.05) | 0.83 (0.64-1.08) | 0.74 (0.56-0.98) | 0.88 (0.66-1.16) | 0.44 |
| <b>Postmenopausal cases</b>                        |             |                  |                  |                  |                  |      |
| Median intake, serving/day                         | 1.2         | 1.9              | 2.5              | 3.2              | 4.6              |      |
| No. of cases/person-years                          | 147/53,314  | 122/53,335       | 116/53,319       | 137/53,289       | 118/53,225       |      |
| Model 2+ dietary fiber                             | 1           | 0.84 (0.65-1.08) | 0.81 (0.61-1.06) | 1.01 (0.76-1.34) | 0.89 (0.64-1.25) | 0.90 |
| Model 2+ vitamin C                                 | 1           | 0.80 (0.63-1.03) | 0.75 (0.57-0.97) | 0.89 (0.68-1.15) | 0.77 (0.57-1.03) | 0.24 |
| Model 2+Beta-carotene                              | 1           | 0.77 (0.60-1.00) | 0.70 (0.52-0.93) | 0.82 (0.60-1.11) | 0.70 (0.49-1.01) | 0.17 |
| Model 2+ animal fat                                | 1           | 0.80 (0.62-1.02) | 0.74 (0.57-0.95) | 0.87 (0.68-1.12) | 0.75 (0.57-0.98) | 0.13 |
| Model 2+red meat                                   | 1           | 0.80 (0.62-1.02) | 0.73 (0.57-0.94) | 0.87 (0.68-1.11) | 0.75 (0.57-0.98) | 0.13 |
| Model 2+AHEI                                       | 1           | 0.79 (0.62-1.01) | 0.73 (0.56-0.94) | 0.86 (0.67-1.11) | 0.73 (0.55-0.96) | 0.10 |
| <b>Adolescent total fruit and vegetable intake</b> |             |                  |                  |                  |                  |      |
| <b>All cases</b>                                   |             |                  |                  |                  |                  |      |
| Median intake, serving/day                         | 1.9         | 3.0              | 3.9              | 5.0              | 7.1              |      |
| No. of cases/person-years                          | 307/134,478 | 264/134,563      | 249/134,499      | 266/134,496      | 261/134,452      |      |
| Model 2+ dietary fiber                             | 1           | 0.89 (0.75-1.06) | 0.85 (0.70-1.04) | 0.92 (0.74-1.15) | 0.92 (0.71-1.20) | 0.79 |
| Model 2+ vitamin C                                 | 1           | 0.84 (0.70-1.00) | 0.77 (0.64-0.92) | 0.79 (0.65-0.97) | 0.77 (0.62-0.96) | 0.06 |
| Model 2+Beta-carotene                              | 1           | 0.83 (0.70-0.99) | 0.76 (0.63-0.92) | 0.79 (0.64-0.98) | 0.78 (0.60-1.00) | 0.13 |
| Model 2+ animal fat                                | 1           | 0.85 (0.72-1.01) | 0.79 (0.66-0.94) | 0.83 (0.69-0.99) | 0.81 (0.67-0.99) | 0.08 |
| Model 2+red meat                                   | 1           | 0.85 (0.72-1.01) | 0.79 (0.66-0.94) | 0.83 (0.69-0.99) | 0.83 (0.69-1.00) | 0.10 |
| Model 2+AHEI                                       | 1           | 0.85 (0.72-1.01) | 0.79 (0.66-0.94) | 0.83 (0.69-1.00) | 0.82 (0.68-1.00) | 0.11 |
| <b>Premenopausal cases</b>                         |             |                  |                  |                  |                  |      |
| Median intake, serving/day                         | 1.9         | 3.0              | 3.9              | 5.0              | 7.0              |      |
| No. of cases/person-years                          | 134/69,418  | 127/69,475       | 96/69,472        | 112/69,480       | 107/69,543       |      |
| Model 2+ dietary fiber                             | 1           | 0.96 (0.74-1.25) | 0.75 (0.55-1.02) | 0.86 (0.62-1.21) | 0.83 (0.56-1.23) | 0.39 |
| Model 2+ vitamin C                                 | 1           | 0.89 (0.68-1.15) | 0.67 (0.50-0.89) | 0.73 (0.54-0.99) | 0.66 (0.47-0.93) | 0.02 |
| Model 2+Beta-carotene                              | 1           | 0.88 (0.67-1.15) | 0.66 (0.49-0.90) | 0.74 (0.53-1.02) | 0.70 (0.47-1.03) | 0.09 |
| Model 2+ animal fat                                | 1           | 0.94 (0.73-1.20) | 0.72 (0.55-0.95) | 0.81 (0.62-1.07) | 0.78 (0.58-1.05) | 0.10 |
| Model 2+red meat                                   | 1           | 0.94 (0.73-1.20) | 0.72 (0.55-0.95) | 0.82 (0.62-1.07) | 0.79 (0.59-1.05) | 0.09 |

|                                      |             |                  |                  |                  |                  |      |
|--------------------------------------|-------------|------------------|------------------|------------------|------------------|------|
| Model 2+AHEI                         | 1           | 0.95 (0.74-1.22) | 0.74 (0.56-0.97) | 0.84 (0.64-1.10) | 0.80 (0.59-1.08) | 0.13 |
| Postmenopausal cases                 |             |                  |                  |                  |                  |      |
| Median intake, serving/day           | 1.9         | 3.0              | 3.9              | 5.0              | 7.1              |      |
| No. of cases/person-years            | 143/53,312  | 119/53,366       | 130/53,333       | 128/53,278       | 120/53,195       |      |
| Model 2+ dietary fiber               | 1           | 0.88 (0.68-1.14) | 0.99 (0.74-1.31) | 1.04 (0.75-1.44) | 1.02 (0.69-1.51) | 0.68 |
| Model 2+ vitamin C                   | 1           | 0.83 (0.64-1.07) | 0.87 (0.66-1.14) | 0.85 (0.64-1.14) | 0.81 (0.58-1.12) | 0.33 |
| Model 2+Beta-carotene                | 1           | 0.80 (0.62-1.04) | 0.82 (0.62-1.09) | 0.80 (0.58-1.09) | 0.76 (0.52-1.09) | 0.24 |
| Model 2+ animal fat                  | 1           | 0.82 (0.64-1.05) | 0.86 (0.67-1.10) | 0.84 (0.65-1.09) | 0.79 (0.59-1.04) | 0.17 |
| Model 2+red meat                     | 1           | 0.82 (0.63-1.05) | 0.85 (0.66-1.09) | 0.84 (0.65-1.08) | 0.79 (0.60-1.04) | 0.18 |
| Model 2+AHEI                         | 1           | 0.81 (0.63-1.04) | 0.84 (0.65-1.08) | 0.82 (0.63-1.07) | 0.77 (0.58-1.02) | 0.14 |
| <b>Adolescent fruit juice intake</b> |             |                  |                  |                  |                  |      |
| All cases                            |             |                  |                  |                  |                  |      |
| Median intake, serving/day           | 0.1         | 0.4              | 0.9              | 1.5              | 2.1              |      |
| No. of cases/person-years            | 285/144,750 | 269/133,916      | 237/125,374      | 267/129,621      | 288/138,185      |      |
| Model 2+ dietary fiber               | 1           | 1.03 (0.87-1.22) | 0.99 (0.83-1.18) | 1.03 (0.87-1.22) | 1.07 (0.89-1.27) | 0.52 |
| Model 2+ vitamin C                   | 1           | 1.04 (0.87-1.24) | 1.00 (0.82-1.22) | 1.05 (0.85-1.30) | 1.07 (0.85-1.35) | 0.55 |
| Model 2+Beta-carotene                | 1           | 1.02 (0.86-1.21) | 0.97 (0.81-1.16) | 1.01 (0.85-1.21) | 1.04 (0.87-1.24) | 0.68 |
| Model 2+ animal fat                  | 1           | 1.02 (0.86-1.21) | 0.97 (0.81-1.16) | 1.01 (0.85-1.20) | 1.03 (0.86-1.23) | 0.78 |
| Model 2+red meat                     | 1           | 1.02 (0.86-1.21) | 0.97 (0.81-1.16) | 1.01 (0.85-1.21) | 1.05 (0.88-1.25) | 0.64 |
| Model 2+AHEI                         | 1           | 1.02 (0.86-1.21) | 0.97 (0.81-1.15) | 1.01 (0.85-1.20) | 1.03 (0.87-1.23) | 0.76 |
| Premenopausal cases                  |             |                  |                  |                  |                  |      |
| Median intake, serving/day           | 0.1         | 0.4              | 0.9              | 1.5              | 2.2              |      |
| No. of cases/person-years            | 107/71,645  | 123/68,496       | 108/67,377       | 126/69,940       | 111/69,591       |      |
| Model 2+ dietary fiber               | 1           | 1.27 (0.97-1.66) | 1.14 (0.87-1.51) | 1.22 (0.93-1.60) | 1.12 (0.84-1.49) | 0.71 |
| Model 2+ vitamin C                   | 1           | 1.27 (0.96-1.67) | 1.15 (0.84-1.56) | 1.21 (0.87-1.67) | 1.08 (0.76-1.55) | 0.95 |
| Model 2+Beta-carotene                | 1           | 1.25 (0.96-1.63) | 1.11 (0.84-1.47) | 1.19 (0.91-1.56) | 1.09 (0.81-1.45) | 0.87 |
| Model 2+ animal fat                  | 1           | 1.26 (0.96-1.64) | 1.12 (0.85-1.48) | 1.20 (0.91-1.57) | 1.10 (0.82-1.46) | 0.81 |
| Model 2+red meat                     | 1           | 1.26 (0.97-1.64) | 1.12 (0.85-1.48) | 1.21 (0.92-1.59) | 1.12 (0.84-1.49) | 0.70 |
| Model 2+AHEI                         | 1           | 1.26 (0.97-1.64) | 1.13 (0.86-1.48) | 1.19 (0.91-1.56) | 1.10 (0.82-1.46) | 0.83 |
| Postmenopausal cases                 |             |                  |                  |                  |                  |      |
| Median intake, serving/day           | 0.1         | 0.3              | 0.9              | 1.5              | 2.1              |      |
| No. of cases/person-years            | 121/47,907  | 141/65,884       | 111/48,809       | 119/51,122       | 148/52,498       |      |
| Model 2+ dietary fiber               | 1           | 0.85 (0.66-1.09) | 0.91 (0.70-1.18) | 0.90 (0.69-1.17) | 1.09 (0.84-1.42) | 0.23 |
| Model 2+ vitamin C                   | 1           | 0.88 (0.68-1.14) | 0.99 (0.73-1.34) | 1.02 (0.74-1.42) | 1.26 (0.89-1.76) | 0.05 |
| Model 2+Beta-carotene                | 1           | 0.83 (0.65-1.06) | 0.88 (0.67-1.15) | 0.87 (0.67-1.14) | 1.05 (0.80-1.36) | 0.35 |
| Model 2+ animal fat                  | 1           | 0.83 (0.65-1.07) | 0.89 (0.68-1.16) | 0.88 (0.67-1.15) | 1.04 (0.80-1.35) | 0.37 |
| Model 2+red meat                     | 1           | 0.83 (0.65-1.06) | 0.88 (0.68-1.15) | 0.87 (0.67-1.14) | 1.05 (0.81-1.35) | 0.35 |
| Model 2+AHEI                         | 1           | 0.83 (0.65-1.06) | 0.88 (0.67-1.14) | 0.86 (0.66-1.12) | 1.02 (0.79-1.32) | 0.44 |

Model 1 was stratified by age in months at the state of follow-up and calendar year of the current questionnaire cycle.

Model 2 was stratified by age in months at start of follow-up and calendar year of the current questionnaire cycle and was simultaneously adjusted for smoking (never, past, current 1-14/day, current 15-24/day, current  $\geq 25$ /day), race (white/non-white), parity and age at first birth (nulliparous, parity  $\leq 2$  and age at first birth  $< 25$ , parity  $\leq 2$  and age at first birth 25- $< 30$ , parity  $\leq 2$  and age at first birth  $\geq 30$ , parity 3-4 and age at first birth  $< 25$ , parity 3-4 and age at first birth 25- $< 30$ , parity 3-4 and age at first birth  $\geq 30$ , parity  $\geq 5$  and age at first birth  $< 25$ , parity  $\geq 5$  and age at first birth  $\geq 25$ ), height ( $< 157$ , 157- $< 165$ , 165- $< 173$ ,  $\geq 173$  cm), BMI at age 18 ( $< 18.5$ , 18.5- $< 22.5$ , 22.5- $< 25$ , 25.0- $< 30$ ,  $\geq 30.0$ ), weight change since age 18 (continuous, missing indicator), age at menarche ( $< 12$ , 12, 13,  $\geq 14$ ), family history of breast cancer (yes, no), history of benign breast disease (yes, no), oral contraceptive use (never, past, current), adolescent alcohol intake (non-drinker,  $< 5$ ,  $\geq 5$  g/day), adult alcohol intake (non-drinker,  $< 5$ , 5- $< 15$ ,  $\geq 15$  g/day), adolescent energy intake (fifth). In postmenopausal women, we additionally adjusted for hormone use (postmenopausal never users, postmenopausal past users, postmenopausal current users), age at menopause ( $< 45$ , 45-46, 47-48, 49-50, 51-52,  $\geq 53$ ). Among all women, we additionally adjusted for hormone use and menopausal status (premenopausal, postmenopausal never users, postmenopausal past users, postmenopausal current users, unknown menopausal status) and age at menopause (premenopausal, unknown menopause,  $< 45$ , 45-46 years, 47-48, 49-50, 51-52,  $\geq 53$ ).

**Table D. Hazard ratio (HR) and 95% confidence intervals (95%CI) for breast cancer according to quintile of intake of subgroups of fruit and vegetable intake during adolescence among women in the Nurses' Health Study II**

|                                            | Quintile of intake |                  |                  |                  |                  |                          |
|--------------------------------------------|--------------------|------------------|------------------|------------------|------------------|--------------------------|
|                                            | 1                  | 2                | 3                | 4                | 5                | <i>P<sub>trend</sub></i> |
| <b>Adolescent green leafy vegetables</b>   |                    |                  |                  |                  |                  |                          |
| All cases                                  |                    |                  |                  |                  |                  |                          |
| Median intake, serving/day                 | 0.07               | 0.1              | 0.4              | 0.6              | 0.9              |                          |
| No. of cases/person-years                  | 231/115,683        | 321/156,124      | 262/140,465      | 265/122,779      | 268/137,374      |                          |
| Model 1                                    | 1                  | 1.02 (0.86-1.21) | 0.95 (0.80-1.14) | 1.08 (0.91-1.29) | 0.98 (0.82-1.17) | 0.86                     |
| Model 2                                    | 1                  | 1.02 (0.86-1.21) | 0.95 (0.79-1.14) | 1.05 (0.88-1.26) | 0.96 (0.80-1.15) | 0.61                     |
| Premenopausal cases                        |                    |                  |                  |                  |                  |                          |
| Median intake, serving/day                 | 0.07               | 0.1              | 0.4              | 0.6              | 0.9              |                          |
| No. of cases/person-years                  | 90/57,203          | 141/80,599       | 111/73,947       | 116/63,745       | 118/71,876       |                          |
| Model 1                                    | 1                  | 1.10 (0.84-1.43) | 0.97 (0.73-1.28) | 1.15 (0.87-1.51) | 1.02 (0.78-1.35) | 0.97                     |
| Model 2                                    | 1                  | 1.11 (0.85-1.46) | 1.00 (0.75-1.33) | 1.15 (0.87-1.53) | 1.04 (0.78-1.38) | 1.00                     |
| Postmenopausal cases                       |                    |                  |                  |                  |                  |                          |
| Median intake, serving/day                 | 0.07               | 0.1              | 0.4              | 0.6              | 0.9              |                          |
| No. of cases/person-years                  | 116/48,256         | 143/57,638       | 133/58,287       | 128/48,306       | 120/53,956       |                          |
| Model 1                                    | 1                  | 0.99 (0.77-1.27) | 0.92 (0.72-1.19) | 1.07 (0.83-1.37) | 0.90 (0.69-1.16) | 0.48                     |
| Model 2                                    | 1                  | 0.98 (0.76-1.25) | 0.90 (0.70-1.16) | 1.00 (0.77-1.30) | 0.84 (0.64-1.09) | 0.21                     |
| <b>Adolescent yellow/orange vegetables</b> |                    |                  |                  |                  |                  |                          |
| All cases                                  |                    |                  |                  |                  |                  |                          |
| Median intake, serving/day                 | 0.06               | 0.1              | 0.3              | 0.4              | 0.8              |                          |
| No. of cases/person-years                  | 255/124,529        | 315/154,645      | 247/126,670      | 282/138,912      | 247/127,489      |                          |
| Model 1                                    | 1                  | 0.98 (0.83-1.16) | 0.92 (0.77-1.10) | 0.98 (0.83-1.16) | 0.92 (0.77-1.10) | 0.39                     |
| Model 2                                    | 1                  | 0.97 (0.82-1.15) | 0.90 (0.75-1.08) | 0.96 (0.81-1.14) | 0.91 (0.76-1.09) | 0.36                     |
| Premenopausal cases                        |                    |                  |                  |                  |                  |                          |
| Median intake, serving/day                 | 0.06               | 0.1              | 0.3              | 0.4              | 0.8              |                          |
| No. of cases/person-years                  | 111/65,610         | 136/79,332       | 109/65,550       | 120/71,820       | 99/64,986        |                          |
| Model 1                                    | 1                  | 1.00 (0.78-1.29) | 0.94 (0.72-1.23) | 0.94 (0.73-1.23) | 0.84 (0.64-1.10) | 0.15                     |
| Model 2                                    | 1                  | 1.01 (0.78-1.30) | 0.94 (0.72-1.24) | 0.95 (0.73-1.24) | 0.85 (0.63-1.13) | 0.19                     |
| Postmenopausal cases                       |                    |                  |                  |                  |                  |                          |
| Median intake, serving/day                 | 0.06               | 0.1              | 0.3              | 0.4              | 0.8              |                          |
| No. of cases/person-years                  | 114/47,789         | 148/61,800       | 117/50,228       | 136/54,950       | 125/51,599       |                          |
| Model 1                                    | 1                  | 1.00 (0.78-1.28) | 0.96 (0.74-1.24) | 1.05 (0.81-1.35) | 1.02 (0.79-1.31) | 0.78                     |
| Model 2                                    | 1                  | 0.97 (0.76-1.25) | 0.92 (0.70-1.19) | 1.01 (0.78-1.31) | 0.99 (0.76-1.30) | 0.86                     |

| <b>Adolescent tomato</b>                 |             |                  |                  |                  |                  |      |
|------------------------------------------|-------------|------------------|------------------|------------------|------------------|------|
| <b>All cases</b>                         |             |                  |                  |                  |                  |      |
| Median intake, serving/day               | 0.2         | 0.4              | 0.5              | 0.6              | 1.1              |      |
| No. of cases/person-years                | 262/124,208 | 409/198,192      | 58/29,021        | 319/179,565      | 297/141,132      |      |
| Model 1                                  | 1           | 0.96 (0.82-1.12) | 0.87 (0.65-1.15) | 0.83 (0.70-0.98) | 0.98 (0.83-1.15) | 0.63 |
| Model 2                                  | 1           | 0.94 (0.80-1.10) | 0.84 (0.63-1.12) | 0.82 (0.69-0.97) | 0.98 (0.82-1.16) | 0.74 |
| <b>Premenopausal cases</b>               |             |                  |                  |                  |                  |      |
| Median intake, serving/day               | 0.2         | 0.4              | 0.5              | 0.6              | 1.1              |      |
| No. of cases/person-years                | 117/64,907  | 177/102,944      | 21/12,364        | 139/94,575       | 121/72,360       |      |
| Model 1                                  | 1           | 0.94 (0.74-1.19) | 0.87 (0.54-1.39) | 0.80 (0.62-1.03) | 0.88 (0.68-1.15) | 0.26 |
| Model 2                                  | 1           | 0.94 (0.74-1.19) | 0.85 (0.53-1.36) | 0.81 (0.63-1.05) | 0.91 (0.69-1.19) | 0.40 |
| <b>Postmenopausal cases</b>              |             |                  |                  |                  |                  |      |
| Median intake, serving/day               | 0.2         | 0.4              | 0.5              | 0.6              | 1.1              |      |
| No. of cases/person-years                | 118/48,286  | 196/78,204       | 31/14,025        | 158/69,233       | 136/56,649       |      |
| Model 1                                  | 1           | 1.03 (0.82-1.29) | 0.88 (0.59-1.31) | 0.91 (0.72-1.16) | 0.99 (0.77-1.26) | 0.68 |
| Model 2                                  | 1           | 0.99 (0.79-1.25) | 0.85 (0.57-1.26) | 0.86 (0.67-1.10) | 0.95 (0.74-1.23) | 0.55 |
| <b>Adolescent cruciferous vegetables</b> |             |                  |                  |                  |                  |      |
| <b>All cases</b>                         |             |                  |                  |                  |                  |      |
| Median intake, serving/day               | 0.07        | 0.1              | 0.2              | 0.4              | 0.7              |      |
| No. of cases/person-years                | 306/146,074 | 202/100,120      | 297/155,540      | 282/146,725      | 260/123,933      |      |
| Model 1                                  | 1           | 0.95 (0.80-1.14) | 0.90 (0.77-1.06) | 0.91 (0.77-1.07) | 1.00 (0.85-1.18) | 0.73 |
| Model 2                                  | 1           | 0.95 (0.79-1.13) | 0.89 (0.75-1.04) | 0.89 (0.76-1.05) | 1.00 (0.84-1.19) | 0.72 |
| <b>Premenopausal cases</b>               |             |                  |                  |                  |                  |      |
| Median intake, serving/day               | 0.07        | 0.1              | 0.2              | 0.4              | 0.7              |      |
| No. of cases/person-years                | 126/74,775  | 96/51,218        | 129/81,621       | 116/76,171       | 109/63,556       |      |
| Model 1                                  | 1           | 1.07 (0.82-1.40) | 0.92 (0.72-1.18) | 0.88 (0.69-1.14) | 1.00 (0.77-1.30) | 0.88 |
| Model 2                                  | 1           | 1.06 (0.81-1.38) | 0.92 (0.72-1.18) | 0.88 (0.68-1.13) | 1.00 (0.77-1.31) | 0.89 |
| <b>Postmenopausal cases</b>              |             |                  |                  |                  |                  |      |
| Median intake, serving/day               | 0.07        | 0.1              | 0.2              | 0.4              | 0.7              |      |
| No. of cases/person-years                | 148/58,324  | 87/40,419        | 148/60,393       | 130/57,554       | 127/49,762       |      |
| Model 1                                  | 1           | 0.83 (0.64-1.09) | 0.94 (0.74-1.18) | 0.85 (0.67-1.08) | 0.99 (0.78-1.26) | 0.74 |
| Model 2                                  | 1           | 0.83 (0.63-1.08) | 0.91 (0.72-1.15) | 0.82 (0.64-1.05) | 0.98 (0.77-1.25) | 0.81 |
| <b>Adolescent other vegetables</b>       |             |                  |                  |                  |                  |      |
| <b>All cases</b>                         |             |                  |                  |                  |                  |      |
| Median intake, serving/day               | 0.4         | 0.6              | 0.9              | 1.2              | 1.8              |      |
| No. of cases/person-years                | 277/134,646 | 278/134,317      | 275/134,629      | 259/134,479      | 258/134,417      |      |
| Model 1                                  | 1           | 0.99 (0.83-1.17) | 0.99 (0.83-1.17) | 0.94 (0.79-1.11) | 0.90 (0.76-1.07) | 0.17 |



|                                                                              |             |                  |                  |                  |                  |      |
|------------------------------------------------------------------------------|-------------|------------------|------------------|------------------|------------------|------|
| Model 2                                                                      | 1           | 0.97 (0.82-1.15) | 0.97 (0.82-1.15) | 0.93 (0.78-1.11) | 0.90 (0.75-1.08) | 0.23 |
| Premenopausal cases                                                          |             |                  |                  |                  |                  |      |
| Median intake, serving/day                                                   | 0.4         | 0.6              | 0.9              | 1.2              | 1.8              |      |
| No. of cases/person-years                                                    | 125/69,417  | 112/69,458       | 119/69,475       | 116/69,427       | 104/69,612       |      |
| Model 1                                                                      | 1           | 0.87 (0.67-1.12) | 0.92 (0.71-1.18) | 0.92 (0.71-1.19) | 0.79 (0.61-1.03) | 0.16 |
| Model 2                                                                      | 1           | 0.89 (0.68-1.15) | 0.94 (0.73-1.22) | 0.97 (0.75-1.27) | 0.83 (0.63-1.11) | 0.35 |
| Postmenopausal cases                                                         |             |                  |                  |                  |                  |      |
| Median intake, serving/day                                                   | 0.4         | 0.7              | 0.9              | 1.3              | 1.8              |      |
| No. of cases/person-years                                                    | 130/53,361  | 139/53,217       | 129/53,292       | 118/53,348       | 124/53,267       |      |
| Model 1                                                                      | 1           | 1.06 (0.83-1.35) | 1.01 (0.79-1.29) | 0.92 (0.72-1.18) | 0.94 (0.74-1.21) | 0.37 |
| Model 2                                                                      | 1           | 1.02 (0.79-1.30) | 0.97 (0.75-1.25) | 0.90 (0.69-1.17) | 0.92 (0.71-1.20) | 0.38 |
| <b>Adolescent fruits and vegetables high in vitamin C</b>                    |             |                  |                  |                  |                  |      |
| All cases                                                                    |             |                  |                  |                  |                  |      |
| Median intake, serving/day                                                   | 0.2         | 0.4              | 0.6              | 0.9              | 1.4              |      |
| No. of cases/person-years                                                    | 291/134,651 | 257/135,224      | 270/132,935      | 262/135,346      | 267/134,299      |      |
| Model 1                                                                      | 1           | 0.88 (0.74-1.04) | 0.94 (0.79-1.11) | 0.89 (0.76-1.06) | 0.93 (0.78-1.09) | 0.56 |
| Model 2                                                                      | 1           | 0.87 (0.73-1.03) | 0.92 (0.77-1.09) | 0.87 (0.73-1.03) | 0.91 (0.77-1.09) | 0.51 |
| Premenopausal cases                                                          |             |                  |                  |                  |                  |      |
| Median intake, serving/day                                                   | 0.2         | 0.4              | 0.6              | 0.9              | 1.4              |      |
| No. of cases/person-years                                                    | 119/69,484  | 117/69,550       | 108/69,592       | 118/69,252       | 114/69,489       |      |
| Model 1                                                                      | 1           | 0.97 (0.75-1.25) | 0.91 (0.70-1.18) | 0.96 (0.74-1.24) | 0.94 (0.73-1.22) | 0.74 |
| Model 2                                                                      | 1           | 0.98 (0.75-1.27) | 0.92 (0.70-1.20) | 0.97 (0.74-1.26) | 0.96 (0.73-1.26) | 0.84 |
| Postmenopausal cases                                                         |             |                  |                  |                  |                  |      |
| Median intake, serving/day                                                   | 0.2         | 0.4              | 0.6              | 0.9              | 1.4              |      |
| No. of cases/person-years                                                    | 144/53,191  | 116/53,276       | 135/53,502       | 120/53,413       | 125/53,092       |      |
| Model 1                                                                      | 1           | 0.78 (0.61-1.00) | 0.89 (0.70-1.13) | 0.80 (0.63-1.02) | 0.86 (0.67-1.09) | 0.39 |
| Model 2                                                                      | 1           | 0.77 (0.60-0.98) | 0.85 (0.67-1.08) | 0.75 (0.58-0.96) | 0.83 (0.64-1.07) | 0.30 |
| <b>Adolescent fruits and vegetables high in <math>\alpha</math>-carotene</b> |             |                  |                  |                  |                  |      |
| All cases                                                                    |             |                  |                  |                  |                  |      |
| Median intake, serving/day                                                   | 0.06        | 0.1              | 0.2              | 0.3              | 0.7              |      |
| No. of cases/person-years                                                    | 264/134,477 | 313/146,760      | 201/98,839       | 307/159,569      | 260/132,471      |      |
| Model 1                                                                      | 1           | 1.07 (0.91-1.26) | 1.02 (0.85-1.23) | 0.97 (0.82-1.15) | 0.98 (0.83-1.17) | 0.53 |
| Model 2                                                                      | 1           | 1.06 (0.90-1.25) | 1.00 (0.83-1.21) | 0.96 (0.81-1.13) | 0.98 (0.82-1.17) | 0.54 |
| Premenopausal cases                                                          |             |                  |                  |                  |                  |      |
| Median intake, serving/day                                                   | 0.06        | 0.1              | 0.2              | 0.3              | 0.7              |      |
| No. of cases/person-years                                                    | 115/69,058  | 129/75,115       | 95/51,259        | 134/83,098       | 101/68,681       |      |
| Model 1                                                                      | 1           | 1.00 (0.77-1.29) | 1.07 (0.82-1.41) | 0.92 (0.71-1.18) | 0.81 (0.62-1.07) | 0.07 |
| Model 2                                                                      | 1           | 1.00 (0.77-1.29) | 1.07 (0.81-1.41) | 0.93 (0.72-1.20) | 0.83 (0.62-1.10) | 0.11 |

|                                                                             |             |                  |                  |                  |                  |      |
|-----------------------------------------------------------------------------|-------------|------------------|------------------|------------------|------------------|------|
| Postmenopausal cases                                                        |             |                  |                  |                  |                  |      |
| Median intake, serving/day                                                  | 0.06        | 0.1              | 0.2              | 0.3              | 0.7              |      |
| No. of cases/person-years                                                   | 118/53,436  | 148/58,414       | 90/39,127        | 150/62,677       | 134/52,671       |      |
| Model 1                                                                     | 1           | 1.16 (0.91-1.48) | 1.04 (0.79-1.37) | 1.11 (0.87-1.41) | 1.16 (0.91-1.50) | 0.39 |
| Model 2                                                                     | 1           | 1.15 (0.90-1.48) | 1.02 (0.77-1.34) | 1.08 (0.84-1.39) | 1.16 (0.89-1.51) | 0.42 |
| <b>Adolescent fruits and vegetables high in <math>\beta</math>-carotene</b> |             |                  |                  |                  |                  |      |
| All cases                                                                   |             |                  |                  |                  |                  |      |
| Median intake, serving/day                                                  | 0.2         | 0.4              | 0.7              | 1.0              | 1.5              |      |
| No. of cases/person-years                                                   | 283/137,522 | 240/125,131      | 304/140,813      | 249/133,966      | 271/135,024      |      |
| Model 1                                                                     | 1           | 0.92 (0.78-1.10) | 1.05 (0.89-1.24) | 0.89 (0.75-1.06) | 0.97 (0.82-1.15) | 0.67 |
| Model 2                                                                     | 1           | 0.90 (0.76-1.07) | 1.02 (0.87-1.21) | 0.86 (0.72-1.02) | 0.94 (0.79-1.12) | 0.48 |
| Premenopausal cases                                                         |             |                  |                  |                  |                  |      |
| Median intake, serving/day                                                  | 0.2         | 0.4              | 0.7              | 1.0              | 1.5              |      |
| No. of cases/person-years                                                   | 126/70,331  | 114/71,387       | 119/66,494       | 97/69,910        | 120/69,261       |      |
| Model 1                                                                     | 1           | 0.90 (0.69-1.16) | 1.01 (0.78-1.30) | 0.75 (0.57-0.98) | 0.94 (0.73-1.21) | 0.47 |
| Model 2                                                                     | 1           | 0.89 (0.69-1.15) | 1.00 (0.77-1.30) | 0.74 (0.56-0.98) | 0.94 (0.72-1.23) | 0.51 |
| Postmenopausal cases                                                        |             |                  |                  |                  |                  |      |
| Median intake, serving/day                                                  | 0.2         | 0.4              | 0.7              | 1.0              | 1.5              |      |
| No. of cases/person-years                                                   | 123/55,065  | 125/49,815       | 145/55,210       | 126/53,274       | 121/53,094       |      |
| Model 1                                                                     | 1           | 1.12 (0.87-1.45) | 1.16 (0.91-1.48) | 1.05 (0.81-1.34) | 1.01 (0.78-1.30) | 0.72 |
| Model 2                                                                     | 1           | 1.10 (0.85-1.41) | 1.10 (0.86-1.41) | 0.97 (0.75-1.26) | 0.97 (0.74-1.26) | 0.46 |
| <b>Adolescent fruits and vegetables high in lutein</b>                      |             |                  |                  |                  |                  |      |
| All cases                                                                   |             |                  |                  |                  |                  |      |
| Median intake, serving/day                                                  | 0           | 0.07             | 0.1              | 0.3              |                  |      |
| No. of cases/person-years                                                   | 587/306,502 | 313/150,552      | 257/122,325      | 190/92,966       |                  |      |
| Model 1                                                                     | 1           | 1.05 (0.91-1.20) | 1.06 (0.92-1.23) | 1.03 (0.87-1.21) |                  | 0.62 |
| Model 2                                                                     | 1           | 1.02 (0.89-1.17) | 1.05 (0.90-1.21) | 1.01 (0.85-1.19) |                  | 0.80 |
| Premenopausal cases                                                         |             |                  |                  |                  |                  |      |
| Median intake, serving/day                                                  | 0           | 0.07             | 0.1              | 0.3              |                  |      |
| No. of cases/person-years                                                   | 262/162,871 | 121/76,227       | 120/61,838       | 73/46,378        |                  |      |
| Model 1                                                                     | 1           | 0.95 (0.76-1.18) | 1.16 (0.93-1.44) | 0.96 (0.74-1.25) |                  | 0.82 |
| Model 2                                                                     | 1           | 0.93 (0.75-1.16) | 1.14 (0.91-1.42) | 0.95 (0.72-1.24) |                  | 0.95 |
| Postmenopausal cases                                                        |             |                  |                  |                  |                  |      |
| Median intake, serving/day                                                  | 0           | 0.07             | 0.1              | 0.3              |                  |      |
| No. of cases/person-years                                                   | 270/117,440 | 161/60,874       | 115/49,988       | 94/38,123        |                  |      |
| Model 1                                                                     | 1           | 1.12 (0.92-1.36) | 0.97 (0.78-1.21) | 1.03 (0.82-1.31) |                  | 0.96 |
| Model 2                                                                     | 1           | 1.09 (0.89-1.33) | 0.95 (0.76-1.19) | 1.01 (0.79-1.29) |                  | 0.89 |

Model 1 was stratified by age in months at the state of follow-up and calendar year of the current questionnaire cycle.

Model 2 was stratified by age in months at start of follow-up and calendar year of the current questionnaire cycle and was simultaneously adjusted for smoking (never, past, current 1-14/day, current 15-24/day, current  $\geq 25$ /day), race (white/non-white), parity and age at first birth (nulliparous, parity  $\leq 2$  and age at first birth  $< 25$ , parity  $\leq 2$  and age at first birth 25- $< 30$ , parity  $\leq 2$  and age at first birth  $\geq 30$ , parity 3-4 and age at first birth  $< 25$ , parity 3-4 and age at first birth 25- $< 30$ , parity 3-4 and age at first birth  $\geq 30$ , parity  $\geq 5$  and age at first birth  $< 25$ , parity  $\geq 5$  and age at first birth  $\geq 25$ ), height ( $< 157$ , 157- $< 165$ , 165- $< 173$ ,  $\geq 173$  cm), BMI at age 18 ( $< 18.5$ , 18.5- $< 22.5$ , 22.5- $< 25$ , 25.0- $< 30$ ,  $\geq 30.0$ ), weight change since age 18 (continuous, missing indicator), age at menarche ( $< 12$ , 12, 13,  $\geq 14$ ), family history of breast cancer (yes, no), history of benign breast disease (yes, no), oral contraceptive use (never, past, current), adolescent alcohol intake (non-drinker,  $< 5$ ,  $\geq 5$  g/day), adult alcohol intake (non-drinker,  $< 5$ , 5- $< 15$ ,  $\geq 15$  g/day), adolescent energy intake (fifth). In postmenopausal women, we additionally adjusted for hormone use (postmenopausal never users, postmenopausal past users, postmenopausal current users), age at menopause ( $< 45$ , 45-46, 47-48, 49-50, 51-52,  $\geq 53$ ). Among all women, we additionally adjusted for hormone use and menopausal status (premenopausal, postmenopausal never users, postmenopausal past users, postmenopausal current users, unknown menopausal status) and age at menopause (premenopausal, unknown menopause,  $< 45$ , 45-46 years, 47-48, 49-50, 51-52,  $\geq 53$ ).

**Table E. Hazard ratio (HR) and 95% confidence intervals (95% CI) for breast cancer according to tertile of intake of subgroups of fruit intake during adolescence among women in the Nurses' Health Study II**

|                                       | Tertile of intake |                  |                  | <i>P</i> <sub>trend</sub> |
|---------------------------------------|-------------------|------------------|------------------|---------------------------|
|                                       | 1                 | 2                | 3                |                           |
| <b>Adolescent total citrus intake</b> |                   |                  |                  |                           |
| Median intake, serving/day            | 0.07              | 0.14             | 0.43             |                           |
| All cases                             |                   |                  |                  |                           |
| No. of cases/person-years             | 573/274,168       | 356/193,572      | 406/201,230      |                           |
| Model 1                               | 1                 | 0.88 (0.77-1.01) | 0.97 (0.86-1.10) | 0.99                      |
| Model 2                               | 1                 | 0.87 (0.76-1.00) | 0.96 (0.84-1.09) | 0.88                      |
| Premenopausal cases                   |                   |                  |                  |                           |
| No. of cases/person-years             | 237/137,382       | 156/101,743      | 179/106,505      |                           |
| Model 1                               | 1                 | 0.87 (0.71-1.07) | 0.96 (0.79-1.17) | 0.90                      |
| Model 2                               | 1                 | 0.88 (0.72-1.09) | 0.97 (0.79-1.19) | 1.00                      |
| Postmenopausal cases                  |                   |                  |                  |                           |
| No. of cases/person-years             | 278/112,035       | 169/74,936       | 187/77,994       |                           |
| Model 1                               | 1                 | 0.91 (0.75-1.10) | 0.97 (0.81-1.17) | 0.91                      |
| Model 2                               | 1                 | 0.89 (0.73-1.08) | 0.94 (0.77-1.14) | 0.71                      |
| <b>Adolescent berries intake</b>      |                   |                  |                  |                           |
| Median intake, serving/day            | 0                 | 0.03             | 0.06             |                           |
| All cases                             |                   |                  |                  |                           |
| No. of cases/person-years             | 430/207,436       | 619/316,276      | 292/144,861      |                           |
| Model 1                               | 1                 | 0.98 (0.86-1.11) | 1.02 (0.88-1.19) | 0.82                      |
| Model 2                               | 1                 | 0.98 (0.86-1.11) | 1.03 (0.88-1.20) | 0.78                      |
| Premenopausal cases                   |                   |                  |                  |                           |
| No. of cases/person-years             | 185/101,275       | 259/166,305      | 129/77,904       |                           |
| Model 1                               | 1                 | 0.85 (0.70-1.03) | 0.92 (0.73-1.15) | 0.40                      |
| Model 2†                              | 1                 | 0.85 (0.70-1.03) | 0.92 (0.72-1.16) | 0.41                      |
| Postmenopausal cases                  |                   |                  |                  |                           |
| No. of cases/person-years             | 202/87,713        | 306/122,407      | 130/54,680       |                           |
| Model 1                               | 1                 | 1.10 (0.92-1.32) | 1.07 (0.86-1.33) | 0.49                      |
| Model 2                               | 1                 | 1.09 (0.91-1.31) | 1.07 (0.85-1.34) | 0.51                      |
| <b>Adolescent pomes intake</b>        |                   |                  |                  |                           |
| Median intake, serving/day            | 0.21              | 0.50             | 0.96             |                           |
| All cases                             |                   |                  |                  |                           |
| No. of cases/person-years             | 513/240,549       | 389/193,607      | 445/238,117      |                           |
| Model 1                               | 1                 | 0.94 (0.82-1.07) | 0.86 (0.76-0.98) | 0.02                      |
| Model 2                               | 1                 | 0.92 (0.81-1.06) | 0.85 (0.74-0.97) | 0.02                      |
| Premenopausal cases                   |                   |                  |                  |                           |
| No. of cases/person-years             | 215/123,092       | 182/100,402      | 179/123,794      |                           |
| Model 1                               | 1                 | 1.04 (0.85-1.27) | 0.82 (0.67-1.00) | 0.03                      |
| Model 2                               | 1                 | 1.06 (0.87-1.30) | 0.83 (0.67-1.03) | 0.06                      |
| Postmenopausal cases                  |                   |                  |                  |                           |
| No. of cases/person-years             | 249/95,540        | 171/76,814       | 220/94,034       |                           |
| Model 1                               | 1                 | 0.85 (0.70-1.03) | 0.88 (0.73-1.05) | 0.19                      |
| Model 2                               | 1                 | 0.81 (0.66-0.99) | 0.84 (0.69-1.02) | 0.11                      |
| <b>Adolescent drupes intake</b>       |                   |                  |                  |                           |
| Median intake, serving/day            | 0                 | 0.07             | 0.14             |                           |
| All cases                             |                   |                  |                  |                           |
| No. of cases/person-years             | 288/139,075       | 520/275,998      | 529/253,860      |                           |
| Model 1                               | 1                 | 0.91 (0.79-1.05) | 1.01 (0.87-1.16) | 0.62                      |

|                                          |             |                  |                  |        |
|------------------------------------------|-------------|------------------|------------------|--------|
| Model 2                                  | 1           | 0.91 (0.78-1.05) | 1.00 (0.86-1.16) | 0.66   |
| <b>Premenopausal cases</b>               |             |                  |                  |        |
| No. of cases/person-years                | 121/71,299  | 215/142,214      | 234/132,130      |        |
| Model 1                                  | 1           | 0.89 (0.71-1.11) | 1.01 (0.81-1.27) | 0.62   |
| Model 2                                  | 1           | 0.88 (0.70-1.11) | 1.02 (0.81-1.29) | 0.57   |
| <b>Postmenopausal cases</b>              |             |                  |                  |        |
| No. of cases/person-years                | 141/55,301  | 253/109,405      | 243/100,298      |        |
| Model 1                                  | 1           | 0.90 (0.73-1.11) | 0.95 (0.77-1.17) | 0.79   |
| Model 2                                  | 1           | 0.90 (0.73-1.11) | 0.94 (0.76-1.16) | 0.70   |
| <b>Adolescent tropical fruits intake</b> |             |                  |                  |        |
| Median intake, serving/day               | 0.07        | 0.21             | 0.50             |        |
| <b>All cases</b>                         |             |                  |                  |        |
| No. of cases/person-years                | 464/196,572 | 427/228,356      | 456/247,410      |        |
| Model 1                                  | 1           | 0.80 (0.70-0.91) | 0.79 (0.69-0.90) | 0.002  |
| Model 2                                  | 1           | 0.78 (0.69-0.90) | 0.76 (0.66-0.87) | 0.0008 |
| <b>Premenopausal cases</b>               |             |                  |                  |        |
| No. of cases/person-years                | 190/99,186  | 194/118,396      | 192/129,753      |        |
| Model 1                                  | 1           | 0.87 (0.71-1.06) | 0.79 (0.64-0.97) | 0.03   |
| Model 2                                  | 1           | 0.88 (0.72-1.08) | 0.78 (0.63-0.97) | 0.03   |
| <b>Postmenopausal cases</b>              |             |                  |                  |        |
| No. of cases/person-years                | 233/79,820  | 194/90,371       | 213/96,219       |        |
| Model 1                                  | 1           | 0.74 (0.61-0.90) | 0.75 (0.62-0.90) | 0.01   |
| Model 2                                  | 1           | 0.71 (0.58-0.86) | 0.71 (0.58-0.87) | 0.005  |
| <b>Adolescent grapes intake</b>          |             |                  |                  |        |
| Median intake, serving/day               | 0.07        | 0.17             | 0.36             |        |
| <b>All cases</b>                         |             |                  |                  |        |
| No. of cases/person-years                | 462/210,639 | 459/234,403      | 423/226,494      |        |
| Model 1                                  | 1           | 0.88 (0.77-1.00) | 0.86 (0.75-0.98) | 0.04   |
| Model 2                                  | 1           | 0.87 (0.76-0.99) | 0.83 (0.73-0.96) | 0.02   |
| <b>Premenopausal cases</b>               |             |                  |                  |        |
| No. of cases/person-years                | 196/108,869 | 196/118,311      | 182/119,750      |        |
| Model 1                                  | 1           | 0.91 (0.74-1.11) | 0.83 (0.68-1.02) | 0.09   |
| Model 2                                  | 1           | 0.93 (0.76-1.14) | 0.83 (0.67-1.03) | 0.10   |
| <b>Postmenopausal cases</b>              |             |                  |                  |        |
| No. of cases/person-years                | 215/83,012  | 223/95,560       | 201/87,506       |        |
| Model 1                                  | 1           | 0.89 (0.74-1.08) | 0.90 (0.74-1.09) | 0.33   |
| Model 2                                  | 1           | 0.85 (0.71-1.03) | 0.86 (0.70-1.05) | 0.21   |
| <b>Adolescent melon intake</b>           |             |                  |                  |        |
| Median intake, serving/day               | 0           | 0.05             | 0.11             |        |
| <b>All cases</b>                         |             |                  |                  |        |
| No. of cases/person-years                | 426/199,713 | 565/282,867      | 347/187,207      |        |
| Model 1                                  | 1           | 0.93 (0.82-1.06) | 0.88 (0.77-1.02) | 0.09   |
| Model 2                                  | 1           | 0.91 (0.80-1.03) | 0.86 (0.74-1.00) | 0.04   |
| <b>Premenopausal cases</b>               |             |                  |                  |        |
| No. of cases/person-years                | 173/102,162 | 239/145,430      | 160/98,489       |        |
| Model 1                                  | 1           | 0.95 (0.78-1.16) | 0.96 (0.77-1.20) | 0.74   |
| Model 2                                  | 1           | 0.94 (0.77-1.14) | 0.95 (0.76-1.19) | 0.66   |
| <b>Postmenopausal cases</b>              |             |                  |                  |        |
| No. of cases/person-years                | 214/80,063  | 269/112,483      | 154/72,757       |        |
| Model 1                                  | 1           | 0.89 (0.74-1.06) | 0.79 (0.64-0.97) | 0.03   |
| Model                                    | 1           | 0.86 (0.72-1.03) | 0.75 (0.61-0.93) | 0.009  |

Model 1 was stratified by age in months at the state of follow-up and calendar year of the current questionnaire cycle. Model 2 was stratified by age in months at start of follow-up and calendar year of the current questionnaire cycle and was simultaneously adjusted for smoking (never, past, current 1-14/day, current 15-24/day, current  $\geq 25$ /day), race (white/non-white), parity and age at first birth (nulliparous, parity  $\leq 2$  and age at first birth  $< 25$ , parity  $\leq 2$  and age at first birth 25- $< 30$ , parity  $\leq 2$  and age at first birth  $\geq 30$ , parity 3-4 and age at first birth  $< 25$ , parity 3-4 and age at first birth 25- $< 30$ , parity 3-4 and age at first birth

$\geq 30$ , parity  $\geq 5$  and age at first birth  $< 25$ , parity  $\geq 5$  and age at first birth  $\geq 25$ ), height ( $< 157$ ,  $157- < 165$ ,  $165- < 173$ ,  $\geq 173$  cm), BMI at age 18 ( $< 18.5$ ,  $18.5- < 22.5$ ,  $22.5- < 25$ ,  $25.0- < 30$ ,  $\geq 30.0$ ), weight change since age 18 (continuous, missing indicator), age at menarche ( $< 12$ ,  $12$ ,  $13$ ,  $\geq 14$ ), family history of breast cancer (yes, no), history of benign breast disease (yes, no), oral contraceptive use (never, past, current), adolescent alcohol intake (non-drinker,  $< 5$ ,  $\geq 5$  g/day), adult alcohol intake (non-drinker,  $< 5$ ,  $5- < 15$ ,  $\geq 15$  g/day), adolescent energy intake (fifth). In postmenopausal women, we additionally adjusted for hormone use (postmenopausal never users, postmenopausal past users, postmenopausal current users), age at menopause ( $< 45$ ,  $45-46$ ,  $47-48$ ,  $49-50$ ,  $51-52$ ,  $\geq 53$ ). Among all women, we additionally adjusted for hormone use and menopausal status (premenopausal, postmenopausal never users, postmenopausal past users, postmenopausal current users, unknown menopausal status) and age at menopause (premenopausal, unknown menopause,  $< 45$ ,  $45-46$  years,  $47-48$ ,  $49-50$ ,  $51-52$ ,  $\geq 53$ ).

**Table F. Hazard ratio (HR) and 95% confidence intervals (95% CI) for breast cancer according to quintile of intake of fruits and vegetable during early adulthood among women in the Nurses' Health Study II**

|                                               | Quintile of intake |                  |                  |                  |                  |                          |
|-----------------------------------------------|--------------------|------------------|------------------|------------------|------------------|--------------------------|
|                                               | 1                  | 2                | 3                | 4                | 5                | <i>P<sub>trend</sub></i> |
| <b>Early adulthood total fruit intake</b>     |                    |                  |                  |                  |                  |                          |
| All cases                                     |                    |                  |                  |                  |                  |                          |
| Median intake, serving/day                    | 0.2                | 0.5              | 0.9              | 1.3              | 2.1              |                          |
| No. of cases/person-years                     | 641/375,096        | 659/378,629      | 657/377,373      | 642/377,000      | 636/376,894      |                          |
| Model 2+ dietary fiber                        | 1                  | 1.03 (0.92-1.16) | 1.05 (0.93-1.18) | 1.05 (0.93-1.19) | 1.08 (0.94-1.24) | 0.33                     |
| Model 2+ vitamin C                            | 1                  | 0.99 (0.88-1.10) | 0.98 (0.87-1.09) | 0.95 (0.85-1.07) | 0.96 (0.85-1.09) | 0.50                     |
| Model 2+Beta-carotene                         | 1                  | 1.00 (0.90-1.12) | 1.00 (0.89-1.12) | 0.98 (0.87-1.10) | 0.99 (0.87-1.12) | 0.77                     |
| Model 2+ animal fat                           | 1                  | 1.00 (0.89-1.11) | 0.99 (0.88-1.11) | 0.97 (0.86-1.09) | 0.98 (0.87-1.11) | 0.70                     |
| Model 2+red meat                              | 1                  | 1.00 (0.89-1.11) | 0.99 (0.88-1.10) | 0.97 (0.86-1.09) | 0.98 (0.87-1.11) | 0.68                     |
| Model 2+AHEI                                  | 1                  | 1.00 (0.90-1.12) | 0.99 (0.89-1.11) | 0.98 (0.87-1.10) | 1.00 (0.88-1.13) | 0.87                     |
| Premenopausal cases                           |                    |                  |                  |                  |                  |                          |
| Median intake, serving/day                    | 0.2                | 0.5              | 0.9              | 1.3              | 2.1              |                          |
| No. of cases/person-years                     | 340/237,032        | 345/234,894      | 339/236,114      | 342/236,389      | 353/235,939      |                          |
| Model 2+ dietary fiber                        | 1                  | 1.04 (0.89-1.21) | 1.04 (0.88-1.23) | 1.08 (0.90-1.28) | 1.16 (0.96-1.41) | 0.12                     |
| Model 2+ vitamin C                            | 1                  | 0.99 (0.85-1.16) | 0.96 (0.82-1.13) | 0.97 (0.82-1.14) | 1.01 (0.85-1.21) | 0.82                     |
| Model 2+Beta-carotene                         | 1                  | 1.00 (0.86-1.17) | 0.98 (0.83-1.14) | 0.98 (0.83-1.16) | 1.02 (0.86-1.21) | 0.81                     |
| Model 2+ animal fat                           | 1                  | 0.99 (0.85-1.15) | 0.97 (0.83-1.13) | 0.97 (0.83-1.14) | 1.02 (0.87-1.21) | 0.73                     |
| Model 2+red meat                              | 1                  | 0.99 (0.85-1.15) | 0.96 (0.82-1.13) | 0.97 (0.83-1.14) | 1.02 (0.86-1.20) | 0.82                     |
| Model 2+AHEI                                  | 1                  | 0.99 (0.85-1.16) | 0.97 (0.83-1.13) | 0.98 (0.83-1.15) | 1.03 (0.87-1.22) | 0.71                     |
| Postmenopausal cases                          |                    |                  |                  |                  |                  |                          |
| Median intake, serving/day                    | 0.2                | 0.5              | 0.9              | 1.3              | 2.1              |                          |
| No. of cases/person-years                     | 237/105,846        | 231/106,794      | 237/105,759      | 245/106,175      | 219/106,040      |                          |
| Model 2+ dietary fiber                        | 1                  | 0.98 (0.81-1.18) | 1.02 (0.84-1.24) | 1.06 (0.86-1.30) | 0.95 (0.75-1.20) | 0.78                     |
| Model 2+ vitamin C                            | 1                  | 0.94 (0.78-1.14) | 0.96 (0.79-1.16) | 0.98 (0.81-1.19) | 0.89 (0.72-1.10) | 0.38                     |
| Model 2+Beta-carotene                         | 1                  | 0.98 (0.81-1.18) | 1.01 (0.83-1.22) | 1.05 (0.86-1.27) | 0.96 (0.78-1.20) | 0.89                     |
| Model 2+ animal fat                           | 1                  | 0.95 (0.79-1.14) | 0.97 (0.80-1.17) | 0.99 (0.82-1.20) | 0.89 (0.73-1.10) | 0.39                     |
| Model 2+red meat                              | 1                  | 0.96 (0.79-1.15) | 0.98 (0.81-1.18) | 1.00 (0.83-1.22) | 0.91 (0.74-1.12) | 0.52                     |
| Model 2+AHEI                                  | 1                  | 0.96 (0.79-1.15) | 0.98 (0.81-1.18) | 1.01 (0.83-1.22) | 0.92 (0.74-1.13) | 0.53                     |
| <b>Early adulthood total vegetable intake</b> |                    |                  |                  |                  |                  |                          |
| All cases                                     |                    |                  |                  |                  |                  |                          |
| Median intake, serving/day                    | 1.1                | 1.8              | 2.5              | 3.3              | 4.8              |                          |
| No. of cases/person-years                     | 639/376,975        | 626/377,037      | 691/376,930      | 613/377,098      | 666/376,953      |                          |
| Model 2+ dietary fiber                        | 1                  | 0.97 (0.86-1.09) | 1.09 (0.97-1.23) | 0.99 (0.87-1.13) | 1.12 (0.96-1.30) | 0.12                     |

|                                                         |             |                  |                  |                  |                  |      |
|---------------------------------------------------------|-------------|------------------|------------------|------------------|------------------|------|
| Model 2+ vitamin C                                      | 1           | 0.92 (0.82-1.03) | 1.00 (0.89-1.12) | 0.88 (0.78-0.99) | 0.97 (0.85-1.10) | 0.66 |
| Model 2+Beta-carotene                                   | 1           | 0.94 (0.83-1.06) | 1.04 (0.92-1.19) | 0.93 (0.81-1.07) | 1.03 (0.88-1.21) | 0.61 |
| Model 2+ animal fat                                     | 1           | 0.92 (0.82-1.03) | 1.01 (0.90-1.13) | 0.89 (0.79-1.00) | 0.98 (0.87-1.11) | 0.78 |
| Model 2+red meat                                        | 1           | 0.92 (0.82-1.03) | 1.01 (0.90-1.13) | 0.89 (0.79-1.00) | 0.98 (0.87-1.11) | 0.79 |
| Model 2+AHEI                                            | 1           | 0.93 (0.83-1.04) | 1.02 (0.91-1.14) | 0.90 (0.80-1.02) | 1.00 (0.88-1.13) | 0.97 |
| <b>Premenopausal cases</b>                              |             |                  |                  |                  |                  |      |
| Median intake, serving/day                              | 1.1         | 1.8              | 2.4              | 3.2              | 4.8              |      |
| No. of cases/person-years                               | 354/235,931 | 300/235,984      | 366/236,006      | 349/236,218      | 350/236,229      |      |
| Model 2+ dietary fiber                                  | 1           | 0.85 (0.72-0.99) | 1.05 (0.89-1.24) | 1.05 (0.87-1.25) | 1.08 (0.88-1.32) | 0.15 |
| Model 2+ vitamin C                                      | 1           | 0.80 (0.68-0.93) | 0.96 (0.82-1.12) | 0.92 (0.78-1.09) | 0.91 (0.77-1.09) | 0.88 |
| Model 2+Beta-carotene                                   | 1           | 0.82 (0.69-0.96) | 0.99 (0.84-1.18) | 0.96 (0.79-1.17) | 0.94 (0.75-1.18) | 0.91 |
| Model 2+ animal fat                                     | 1           | 0.80 (0.68-0.93) | 0.96 (0.82-1.11) | 0.92 (0.79-1.08) | 0.91 (0.77-1.08) | 0.87 |
| Model 2+red meat                                        | 1           | 0.79 (0.68-0.93) | 0.96 (0.82-1.11) | 0.92 (0.78-1.08) | 0.91 (0.77-1.07) | 0.82 |
| Model 2+AHEI                                            | 1           | 0.80 (0.68-0.94) | 0.96 (0.82-1.12) | 0.93 (0.79-1.09) | 0.93 (0.78-1.10) | 0.98 |
| <b>Postmenopausal cases</b>                             |             |                  |                  |                  |                  |      |
| Median intake, serving/day                              | 1.1         | 1.9              | 2.5              | 3.3              | 4.9              |      |
| No. of cases/person-years                               | 234/106,123 | 253/106,190      | 222/106,187      | 221/106,073      | 239/106,042      |      |
| Model 2+ dietary fiber                                  | 1           | 1.04 (0.86-1.26) | 0.94 (0.77-1.15) | 0.95 (0.76-1.18) | 1.03 (0.81-1.32) | 0.90 |
| Model 2+ vitamin C                                      | 1           | 1.01 (0.84-1.21) | 0.89 (0.73-1.07) | 0.88 (0.72-1.07) | 0.95 (0.77-1.18) | 0.53 |
| Model 2+Beta-carotene                                   | 1           | 1.06 (0.87-1.28) | 0.97 (0.78-1.20) | 1.00 (0.79-1.26) | 1.14 (0.87-1.49) | 0.36 |
| Model 2+ animal fat                                     | 1           | 1.01 (0.84-1.21) | 0.89 (0.74-1.08) | 0.89 (0.73-1.08) | 0.97 (0.79-1.18) | 0.58 |
| Model 2+red meat                                        | 1           | 1.01 (0.84-1.21) | 0.90 (0.74-1.09) | 0.90 (0.74-1.09) | 0.98 (0.80-1.20) | 0.70 |
| Model 2+AHEI                                            | 1           | 1.01 (0.85-1.22) | 0.90 (0.74-1.09) | 0.90 (0.74-1.10) | 0.98 (0.80-1.21) | 0.73 |
| <b>Early adulthood total fruit and vegetable intake</b> |             |                  |                  |                  |                  |      |
| <b>All cases</b>                                        |             |                  |                  |                  |                  |      |
| Median intake, serving/day                              | 1.6         | 2.6              | 3.5              | 4.5              | 6.6              |      |
| No. of cases/person-years                               | 635/376,997 | 639/377,028      | 671/377,035      | 656/376,991      | 634/376,942      |      |
| Model 2+ dietary fiber                                  | 1           | 1.02 (0.90-1.15) | 1.12 (0.98-1.27) | 1.12 (0.97-1.29) | 1.13 (0.95-1.34) | 0.15 |
| Model 2+ vitamin C                                      | 1           | 0.94 (0.84-1.06) | 0.98 (0.87-1.10) | 0.95 (0.84-1.07) | 0.93 (0.81-1.06) | 0.36 |
| Model 2+Beta-carotene                                   | 1           | 0.97 (0.86-1.09) | 1.03 (0.90-1.17) | 1.00 (0.86-1.15) | 0.98 (0.83-1.16) | 0.89 |
| Model 2+ animal fat                                     | 1           | 0.95 (0.85-1.06) | 1.00 (0.89-1.12) | 0.96 (0.85-1.08) | 0.95 (0.83-1.08) | 0.52 |
| Model 2+red meat                                        | 1           | 0.95 (0.85-1.06) | 1.00 (0.89-1.12) | 0.96 (0.85-1.08) | 0.95 (0.84-1.08) | 0.52 |
| Model 2+AHEI                                            | 1           | 0.96 (0.85-1.07) | 1.00 (0.89-1.13) | 0.98 (0.86-1.10) | 0.97 (0.85-1.10) | 0.74 |
| <b>Premenopausal cases</b>                              |             |                  |                  |                  |                  |      |
| Median intake, serving/day                              | 1.6         | 2.6              | 3.4              | 4.5              | 6.5              |      |
| No. of cases/person-years                               | 346/235,935 | 313/236,063      | 364/236,124      | 341/236,115      | 355/236,132      |      |
| Model 2+ dietary fiber                                  | 1           | 0.94 (0.80-1.11) | 1.15 (0.96-1.37) | 1.11 (0.91-1.36) | 1.26 (1.00-1.58) | 0.02 |
| Model 2+ vitamin C                                      | 1           | 0.86 (0.73-1.01) | 0.99 (0.84-1.16) | 0.92 (0.77-1.09) | 0.97 (0.81-1.17) | 0.85 |
| Model 2+Beta-carotene                                   | 1           | 0.88 (0.75-1.04) | 1.03 (0.87-1.23) | 0.96 (0.79-1.17) | 1.01 (0.81-1.27) | 0.63 |
| Model 2+ animal fat                                     | 1           | 0.86 (0.73-1.00) | 0.99 (0.85-1.16) | 0.92 (0.78-1.08) | 0.98 (0.82-1.16) | 0.82 |



|                                           |             |                  |                  |                  |                  |      |
|-------------------------------------------|-------------|------------------|------------------|------------------|------------------|------|
| Model 2+red meat                          | 1           | 0.86 (0.73-1.00) | 0.99 (0.84-1.15) | 0.91 (0.78-1.08) | 0.97 (0.82-1.15) | 0.90 |
| Model 2+AHEI                              | 1           | 0.86 (0.74-1.01) | 0.99 (0.85-1.16) | 0.93 (0.78-1.09) | 0.99 (0.83-1.18) | 0.73 |
| <b>Postmenopausal cases</b>               |             |                  |                  |                  |                  |      |
| Median intake, serving/day                | 1.6         | 2.6              | 3.5              | 4.6              | 6.7              |      |
| No. of cases/person-years                 | 230/106,264 | 246/106,040      | 227/106,137      | 237/106,137      | 229/106,037      |      |
| Model 2+ dietary fiber                    | 1           | 1.07 (0.88-1.30) | 1.03 (0.83-1.28) | 1.09 (0.85-1.39) | 1.07 (0.81-1.42) | 0.71 |
| Model 2+ vitamin C                        | 1           | 1.01 (0.84-1.22) | 0.94 (0.77-1.14) | 0.96 (0.78-1.18) | 0.95 (0.76-1.18) | 0.58 |
| Model 2+Beta-carotene                     | 1           | 1.09 (0.89-1.32) | 1.06 (0.85-1.31) | 1.13 (0.89-1.44) | 1.17 (0.88-1.54) | 0.31 |
| Model 2+ animal fat                       | 1           | 1.02 (0.85-1.23) | 0.95 (0.78-1.15) | 0.98 (0.80-1.19) | 0.96 (0.77-1.19) | 0.62 |
| Model 2+red meat                          | 1           | 1.03 (0.85-1.24) | 0.96 (0.79-1.17) | 0.99 (0.82-1.21) | 0.98 (0.79-1.21) | 0.79 |
| Model 2+AHEI                              | 1           | 1.03 (0.85-1.23) | 0.96 (0.79-1.17) | 0.99 (0.81-1.22) | 0.98 (0.79-1.22) | 0.81 |
| <b>Early adulthood fruit juice Intake</b> |             |                  |                  |                  |                  |      |
| <b>All cases</b>                          |             |                  |                  |                  |                  |      |
| Median intake, serving/day                | 0           | 0.2              | 0.6              | 1.2              | 2.0              |      |
| No. of cases/person-years                 | 659/399,290 | 631/359,799      | 602/363,546      | 680/381,851      | 661/379,702      |      |
| Model 2+ dietary fiber                    | 1           | 1.10 (0.98-1.23) | 1.04 (0.92-1.16) | 1.11 (0.99-1.24) | 1.13 (1.00-1.26) | 0.08 |
| Model 2+ vitamin C                        | 1           | 1.10 (0.98-1.23) | 1.03 (0.92-1.16) | 1.11 (0.99-1.25) | 1.14 (1.01-1.30) | 0.06 |
| Model 2+Beta-carotene                     | 1           | 1.10 (0.99-1.23) | 1.03 (0.92-1.16) | 1.11 (0.99-1.24) | 1.12 (1.00-1.26) | 0.09 |
| Model 2+ animal fat                       | 1           | 1.10 (0.98-1.23) | 1.03 (0.92-1.15) | 1.10 (0.99-1.23) | 1.13 (1.00-1.26) | 0.08 |
| Model 2+red meat                          | 1           | 1.10 (0.98-1.22) | 1.02 (0.92-1.15) | 1.10 (0.98-1.23) | 1.12 (0.99-1.25) | 0.10 |
| Model 2+AHEI                              | 1           | 1.10 (0.98-1.22) | 1.02 (0.91-1.14) | 1.08 (0.97-1.21) | 1.10 (0.98-1.24) | 0.22 |
| <b>Premenopausal cases</b>                |             |                  |                  |                  |                  |      |
| Median intake, serving/day                | 0           | 0.2              | 0.6              | 1.2              | 2.1              |      |
| No. of cases/person-years                 | 325/237,972 | 333/237,215      | 355/233,474      | 352/233,467      | 353/237,779      |      |
| Model 2+ dietary fiber                    | 1           | 1.07 (0.91-1.25) | 1.13 (0.97-1.32) | 1.13 (0.97-1.32) | 1.14 (0.97-1.33) | 0.16 |
| Model 2+ vitamin C                        | 1           | 1.07 (0.92-1.25) | 1.15 (0.98-1.34) | 1.17 (0.99-1.38) | 1.19 (1.00-1.42) | 0.06 |
| Model 2+Beta-carotene                     | 1           | 1.07 (0.92-1.25) | 1.13 (0.97-1.32) | 1.13 (0.97-1.32) | 1.14 (0.97-1.34) | 0.17 |
| Model 2+ animal fat                       | 1           | 1.07 (0.91-1.24) | 1.13 (0.96-1.31) | 1.13 (0.96-1.32) | 1.14 (0.97-1.35) | 0.13 |
| Model 2+red meat                          | 1           | 1.06 (0.91-1.24) | 1.12 (0.96-1.31) | 1.12 (0.96-1.31) | 1.13 (0.96-1.33) | 0.17 |
| Model 2+AHEI                              | 1           | 1.07 (0.91-1.25) | 1.12 (0.96-1.31) | 1.11 (0.95-1.31) | 1.12 (0.95-1.32) | 0.26 |
| <b>Postmenopausal cases</b>               |             |                  |                  |                  |                  |      |
| Median intake, serving/day                | 0           | 0.2              | 0.5              | 1.2              | 2.0              |      |
| No. of cases/person-years                 | 262/122,468 | 207/88,494       | 225/106,537      | 247/113,306      | 227/99,537       |      |
| Model 2+ dietary fiber                    | 1           | 1.12 (0.93-1.34) | 0.99 (0.82-1.19) | 1.03 (0.86-1.23) | 1.09 (0.90-1.32) | 0.59 |
| Model 2+ vitamin C                        | 1           | 1.11 (0.92-1.33) | 0.97 (0.80-1.17) | 1.00 (0.82-1.20) | 1.07 (0.87-1.31) | 0.76 |
| Model 2+Beta-carotene                     | 1           | 1.12 (0.93-1.34) | 0.99 (0.82-1.19) | 1.03 (0.86-1.23) | 1.09 (0.90-1.32) | 0.57 |
| Model 2+ animal fat                       | 1           | 1.11 (0.93-1.34) | 0.98 (0.82-1.17) | 1.01 (0.85-1.21) | 1.07 (0.88-1.30) | 0.71 |
| Model 2+red meat                          | 1           | 1.11 (0.92-1.34) | 0.98 (0.81-1.17) | 1.01 (0.85-1.21) | 1.08 (0.89-1.30) | 0.66 |
| Model 2+AHEI                              | 1           | 1.11 (0.92-1.34) | 0.98 (0.81-1.17) | 1.01 (0.84-1.21) | 1.07 (0.88-1.30) | 0.75 |

\* $P_{\text{trend}}$  calculated with median intake of each variable in each quintile as a continuous variable.

Model 2 was stratified by age in months at start of follow-up and calendar year of the current questionnaire cycle and was simultaneously adjusted for race (white, non-white), family history of breast cancer in mother or sisters (yes, no), history of benign breast disease (yes, no), smoking (never, past, current 1 to 14/day, current 15 to 24/day, current  $\geq 25$ /day), height (<62, 62 to <65, 65 to <68,  $\geq 68$  inches), BMI at age 18 years (<18.5, 18.5–<22.5, 22.5–<25, 25.0–<30,  $\geq 30.0$  kg/m<sup>2</sup>), weight change since age 18 (continuous, missing indicator), age at menarche (<12, 12, 13,  $\geq 14$  years), parity and age at first birth (nulliparous, parity  $\leq 2$  and age at first birth <25 years, parity  $\leq 2$  and age at first birth 25 to <30 years, parity  $\leq 2$  and age at first birth  $\geq 30$  years, parity 3 to 4 and age at first birth <25 years, parity 3 to 4 and age at first birth 25 to <30 years, parity 3 to 4 and age at first birth  $\geq 30$  years, parity  $\geq 5$  and age at first birth <25 years, parity  $\geq 5$  and age at first birth  $\geq 25$  years), oral contraceptive use (never, past, current), alcohol intake (nondrinker, <5, 5 to <15,  $\geq 15$  g/day), and energy (quintile). In postmenopausal women, we additionally adjusted for hormone use (postmenopausal never users, postmenopausal past users, postmenopausal current users), age at menopause (<45 years, 45 to 46 years, 47 to 48, 49 to 50 years, 51 to 52 years,  $\geq 53$  years). Among all women, we additionally adjusted for hormone use and menopausal status (premenopausal, postmenopausal never users, postmenopausal past users, postmenopausal current users, unknown menopausal status) and, age at menopause (premenopausal, unknown menopause, <45 years, 45 to 46 years, 47 to 48, 49 to 50 years, 51 to 52 years,  $\geq 53$  years).

**Table G. Hazard ratio (HR) and 95% confidence intervals (95% CI) for breast cancer according to quintile of intake of subgroups of fruit and vegetable intake during early adulthood among women in the Nurses' Health Study II**

|                                                       | Quintile of intake |                  |                  |                  |                  |                           |
|-------------------------------------------------------|--------------------|------------------|------------------|------------------|------------------|---------------------------|
|                                                       | 1                  | 2                | 3                | 4                | 5                | <i>P</i> <sub>trend</sub> |
| <b>Early adulthood green leafy vegetable intake</b>   |                    |                  |                  |                  |                  |                           |
| All cases                                             |                    |                  |                  |                  |                  |                           |
| Median intake, serving/day                            | 0.1                | 0.3              | 0.5              | 0.9              | 1.3              |                           |
| No. of cases/person-years                             | 616/368,720        | 554/314,879      | 709/442,590      | 717/390,096      | 639/368,080      |                           |
| Model 1                                               | 1                  | 1.03 (0.92-1.16) | 0.93 (0.84-1.04) | 1.05 (0.94-1.16) | 0.97 (0.87-1.08) | 0.78                      |
| Model 2                                               | 1                  | 0.99 (0.88-1.12) | 0.92 (0.82-1.02) | 1.00 (0.89-1.12) | 0.94 (0.84-1.06) | 0.50                      |
| Premenopausal cases                                   |                    |                  |                  |                  |                  |                           |
| Median intake, serving/day                            | 0.1                | 0.3              | 0.5              | 0.9              | 1.3              |                           |
| No. of cases/person-years                             | 331/231,521        | 307/198,670      | 366/279,200      | 378/243,993      | 337/226,603      |                           |
| Model 1                                               | 1                  | 1.04 (0.89-1.21) | 0.88 (0.76-1.03) | 1.02 (0.88-1.18) | 0.96 (0.82-1.11) | 0.71                      |
| Model 2                                               | 1                  | 1.00 (0.85-1.17) | 0.88 (0.76-1.02) | 0.97 (0.83-1.13) | 0.93 (0.79-1.09) | 0.46                      |
| Postmenopausal cases                                  |                    |                  |                  |                  |                  |                           |
| Median intake, serving/day                            | 0.1                | 0.4              | 0.6              | 0.9              | 1.3              |                           |
| No. of cases/person-years                             | 223/100,087        | 291/132,534      | 179/83,146       | 250/110,154      | 226/104,525      |                           |
| Model 1                                               | 1                  | 0.96 (0.81-1.15) | 0.93 (0.76-1.14) | 0.98 (0.82-1.18) | 0.93 (0.77-1.12) | 0.56                      |
| Model 2                                               | 1                  | 0.94 (0.79-1.12) | 0.91 (0.74-1.11) | 0.93 (0.77-1.13) | 0.90 (0.74-1.10) | 0.38                      |
| <b>Early adulthood yellow/orange vegetable intake</b> |                    |                  |                  |                  |                  |                           |
| All cases                                             |                    |                  |                  |                  |                  |                           |
| Median intake, serving/day                            | 0.03               | 0.1              | 0.2              | 0.3              | 0.6              |                           |
| No. of cases/person-years                             | 736/415,912        | 535/331,560      | 664/386,324      | 681/378,492      | 619/372,272      |                           |
| Model 1                                               | 1                  | 0.90 (0.80-1.00) | 0.94 (0.84-1.04) | 0.96 (0.86-1.06) | 0.89 (0.80-0.99) | 0.15                      |
| Model 2                                               | 1                  | 0.89 (0.80-1.00) | 0.93 (0.83-1.03) | 0.94 (0.85-1.05) | 0.89 (0.79-0.99) | 0.16                      |
| Premenopausal cases                                   |                    |                  |                  |                  |                  |                           |
| Median intake, serving/day                            | 0.03               | 0.1              | 0.2              | 0.3              | 0.6              |                           |
| No. of cases/person-years                             | 394/262,499        | 279/207,852      | 359/241,798      | 362/235,533      | 325/232,431      |                           |
| Model 1                                               | 1                  | 0.88 (0.75-1.02) | 0.94 (0.82-1.09) | 0.95 (0.82-1.10) | 0.86 (0.74-0.99) | 0.12                      |
| Model 2†                                              | 1                  | 0.87 (0.75-1.02) | 0.94 (0.81-1.08) | 0.94 (0.81-1.09) | 0.85 (0.72-0.99) | 0.11                      |
| Postmenopausal cases                                  |                    |                  |                  |                  |                  |                           |
| Median intake, serving/day                            | 0.03               | 0.1              | 0.2              | 0.3              | 0.6              |                           |
| No. of cases/person-years                             | 266/112,202        | 188/91,761       | 248/115,493      | 235/103,767      | 232/107,278      |                           |
| Model 1                                               | 1                  | 0.86 (0.71-1.04) | 0.89 (0.75-1.06) | 0.94 (0.79-1.12) | 0.92 (0.77-1.09) | 0.77                      |
| Model 2                                               | 1                  | 0.85 (0.70-1.02) | 0.88 (0.74-1.05) | 0.94 (0.78-1.12) | 0.91 (0.75-1.10) | 0.78                      |

| <b>Early adulthood tomato intake</b>                |             |                  |                  |                  |                  |      |
|-----------------------------------------------------|-------------|------------------|------------------|------------------|------------------|------|
| All cases                                           |             |                  |                  |                  |                  |      |
| Median intake, serving/day                          | 0.2         | 0.3              | 0.4              | 0.7              | 1.2              |      |
| No. of cases/person-years                           | 590/374,956 | 542/316,467      | 749/428,407      | 691/387,765      | 663/377,069      |      |
| Model 1                                             | 1           | 1.07 (0.95-1.20) | 1.06 (0.95-1.18) | 1.09 (0.98-1.22) | 1.06 (0.94-1.18) | 0.46 |
| Model 2                                             | 1           | 1.04 (0.93-1.17) | 1.04 (0.93-1.16) | 1.07 (0.95-1.20) | 1.07 (0.95-1.20) | 0.33 |
| Premenopausal cases                                 |             |                  |                  |                  |                  |      |
| Median intake, serving/day                          | 0.2         | 0.3              | 0.4              | 0.7              | 1.2              |      |
| No. of cases/person-years                           | 330/235,515 | 291/200,297      | 389/265,259      | 369/245,869      | 340/233,239      |      |
| Model 1                                             | 1           | 1.01 (0.86-1.18) | 0.98 (0.85-1.14) | 1.02 (0.88-1.19) | 0.97 (0.83-1.13) | 0.79 |
| Model 2                                             | 1           | 0.99 (0.85-1.17) | 0.98 (0.84-1.13) | 1.01 (0.87-1.18) | 0.97 (0.83-1.14) | 0.84 |
| Postmenopausal cases                                |             |                  |                  |                  |                  |      |
| Median intake, serving/day                          | 0.2         | 0.3              | 0.5              | 0.7              | 1.2              |      |
| No. of cases/person-years                           | 200/100,817 | 282/129,837      | 186/81,962       | 257/112,404      | 244/105,480      |      |
| Model 1                                             | 1           | 1.09 (0.91-1.30) | 1.13 (0.92-1.38) | 1.14 (0.95-1.37) | 1.14 (0.94-1.38) | 0.23 |
| Model 2                                             | 1           | 1.06 (0.88-1.27) | 1.11 (0.90-1.36) | 1.11 (0.91-1.34) | 1.14 (0.93-1.39) | 0.23 |
| <b>Early adulthood cruciferous vegetable intake</b> |             |                  |                  |                  |                  |      |
| All cases                                           |             |                  |                  |                  |                  |      |
| Median intake, serving/day                          | 0.07        | 0.2              | 0.3              | 0.5              | 0.9              |      |
| No. of cases/person-years                           | 634/396,743 | 628/346,743      | 661/388,573      | 669/376,233      | 641/376,311      |      |
| Model 1                                             | 1           | 1.10 (0.99-1.23) | 1.00 (0.90-1.12) | 1.03 (0.92-1.14) | 0.96 (0.86-1.07) | 0.14 |
| Model 2                                             | 1           | 1.09 (0.98-1.22) | 1.01 (0.90-1.13) | 1.02 (0.92-1.14) | 0.98 (0.87-1.10) | 0.35 |
| Premenopausal cases                                 |             |                  |                  |                  |                  |      |
| Median intake, serving/day                          | 0.07        | 0.2              | 0.3              | 0.5              | 0.9              |      |
| No. of cases/person-years                           | 344/255,090 | 349/222,327      | 353/243,990      | 339/218,931      | 333/239,798      |      |
| Model 1                                             | 1           | 1.10 (0.95-1.28) | 0.99 (0.86-1.15) | 1.04 (0.90-1.21) | 0.92 (0.79-1.07) | 0.10 |
| Model 2                                             | 1           | 1.10 (0.94-1.28) | 1.01 (0.86-1.17) | 1.04 (0.89-1.21) | 0.93 (0.79-1.08) | 0.14 |
| Postmenopausal cases                                |             |                  |                  |                  |                  |      |
| Median intake, serving/day                          | 0.07        | 0.2              | 0.3              | 0.5              | 0.9              |      |
| No. of cases/person-years                           | 217/102,318 | 229/105,520      | 244/111,834      | 255/110,981      | 223/99,851       |      |
| Model 1                                             | 1           | 1.01 (0.84-1.22) | 0.99 (0.82-1.19) | 1.06 (0.88-1.27) | 1.01 (0.84-1.22) | 0.81 |
| Model 2                                             | 1           | 1.01 (0.84-1.22) | 1.00 (0.83-1.20) | 1.08 (0.89-1.30) | 1.05 (0.87-1.28) | 0.49 |
| <b>Early adulthood other vegetable intake</b>       |             |                  |                  |                  |                  |      |
| All cases                                           |             |                  |                  |                  |                  |      |
| Median intake, serving/day                          | 0.3         | 0.5              | 0.7              | 1.0              | 1.6              |      |
| No. of cases/person-years                           | 671/377,419 | 657/376,395      | 644/376,879      | 661/377,192      | 602/376,931      |      |
| Model 1                                             | 1           | 0.97 (0.87-1.08) | 0.94 (0.84-1.05) | 0.97 (0.87-1.08) | 0.88 (0.79-0.98) | 0.03 |

|                                                                                   |             |                  |                  |                  |                  |      |
|-----------------------------------------------------------------------------------|-------------|------------------|------------------|------------------|------------------|------|
| Model 2                                                                           | 1           | 0.96 (0.86-1.07) | 0.93 (0.83-1.04) | 0.97 (0.87-1.09) | 0.90 (0.80-1.02) | 0.15 |
| Premenopausal cases                                                               |             |                  |                  |                  |                  |      |
| Median intake, serving/day                                                        | 0.3         | 0.5              | 0.7              | 1.0              | 1.6              |      |
| No. of cases/person-years                                                         | 348/235,577 | 352/236,257      | 332/236,172      | 350/236,180      | 337/236,081      |      |
| Model 1                                                                           | 1           | 1.00 (0.86-1.16) | 0.92 (0.79-1.07) | 0.98 (0.85-1.14) | 0.95 (0.81-1.10) | 0.53 |
| Model 2                                                                           | 1           | 0.99 (0.85-1.15) | 0.91 (0.78-1.06) | 0.99 (0.85-1.16) | 0.97 (0.82-1.14) | 0.82 |
| Postmenopausal cases                                                              |             |                  |                  |                  |                  |      |
| Median intake, serving/day                                                        | 0.3         | 0.5              | 0.7              | 1.0              | 1.6              |      |
| No. of cases/person-years                                                         | 257/106,214 | 230/105,963      | 224/106,153      | 239/106,100      | 219/106,129      |      |
| Model 1                                                                           | 1           | 0.90 (0.75-1.07) | 0.86 (0.72-1.03) | 0.93 (0.78-1.11) | 0.86 (0.72-1.03) | 0.22 |
| Model 2                                                                           | 1           | 0.88 (0.73-1.05) | 0.86 (0.71-1.03) | 0.92 (0.76-1.11) | 0.86 (0.71-1.05) | 0.32 |
| <b>Early adulthood fruits and vegetables high in vitamin C</b>                    |             |                  |                  |                  |                  |      |
| All cases                                                                         |             |                  |                  |                  |                  |      |
| Median intake, serving/day                                                        | 0.2         | 0.4              | 0.6              | 0.9              | 1.5              |      |
| No. of cases/person-years                                                         | 610/375,560 | 660/378,372      | 670/377,366      | 684/376,741      | 611/376,931      |      |
| Model 1                                                                           | 1           | 1.05 (0.94-1.17) | 1.03 (0.93-1.15) | 1.04 (0.93-1.16) | 0.90 (0.80-1.01) | 0.02 |
| Model 2                                                                           | 1           | 1.04 (0.93-1.16) | 1.02 (0.92-1.15) | 1.04 (0.92-1.16) | 0.92 (0.82-1.04) | 0.08 |
| Premenopausal cases                                                               |             |                  |                  |                  |                  |      |
| Median intake, serving/day                                                        | 0.2         | 0.4              | 0.6              | 0.9              | 1.4              |      |
| No. of cases/person-years                                                         | 328/235,656 | 360/236,172      | 330/236,264      | 364/236,029      | 337/236,241      |      |
| Model 1                                                                           | 1           | 1.05 (0.91-1.22) | 0.93 (0.79-1.08) | 1.01 (0.87-1.18) | 0.91 (0.78-1.06) | 0.15 |
| Model 2                                                                           | 1           | 1.06 (0.91-1.23) | 0.93 (0.79-1.08) | 1.01 (0.87-1.18) | 0.92 (0.78-1.08) | 0.23 |
| Postmenopausal cases                                                              |             |                  |                  |                  |                  |      |
| Median intake, serving/day                                                        | 0.2         | 0.4              | 0.6              | 0.9              | 1.5              |      |
| No. of cases/person-years                                                         | 231/106,246 | 217/105,903      | 260/106,473      | 254/106,058      | 207/105,926      |      |
| Model 1                                                                           | 1           | 0.92 (0.76-1.10) | 1.08 (0.91-1.30) | 1.06 (0.89-1.27) | 0.85 (0.71-1.03) | 0.18 |
| Model 2                                                                           | 1           | 0.91 (0.75-1.09) | 1.09 (0.91-1.31) | 1.07 (0.88-1.28) | 0.88 (0.72-1.07) | 0.33 |
| <b>Early adulthood fruits and vegetables high in <math>\alpha</math>-carotene</b> |             |                  |                  |                  |                  |      |
| All cases                                                                         |             |                  |                  |                  |                  |      |
| Median intake, serving/day                                                        | 0.03        | 0.10             | 0.14             | 0.2              | 0.5              |      |
| No. of cases/person-years                                                         | 623/346,898 | 783/480,936      | 411/240,372      | 730/407,367      | 688/408,506      |      |
| Model 1                                                                           | 1           | 0.89 (0.80-0.99) | 0.93 (0.82-1.05) | 0.95 (0.85-1.06) | 0.90 (0.80-1.00) | 0.25 |
| Model 2                                                                           | 1           | 0.88 (0.79-0.98) | 0.92 (0.81-1.04) | 0.94 (0.84-1.04) | 0.89 (0.80-1.00) | 0.28 |
| Premenopausal cases                                                               |             |                  |                  |                  |                  |      |
| Median intake, serving/day                                                        | 0.03        | 0.10             | 0.14             | 0.2              | 0.5              |      |
| No. of cases/person-years                                                         | 341/217,158 | 415/300,563      | 223/151,632      | 380/253,910      | 360/256,611      |      |
| Model 1                                                                           | 1           | 0.85 (0.74-0.99) | 0.89 (0.75-1.06) | 0.89 (0.77-1.03) | 0.82 (0.71-0.95) | 0.06 |
| Model 2                                                                           | 1           | 0.85 (0.74-0.98) | 0.89 (0.75-1.05) | 0.88 (0.76-1.03) | 0.82 (0.70-0.96) | 0.06 |

|                                                                                  |              |                  |                  |                  |                  |      |
|----------------------------------------------------------------------------------|--------------|------------------|------------------|------------------|------------------|------|
| Postmenopausal cases                                                             |              |                  |                  |                  |                  |      |
| Median intake, serving/day                                                       | 0.03         | 0.10             | 0.14             | 0.2              | 0.5              |      |
| No. of cases/person-years                                                        | 224/94,684   | 266/134,073      | 144/66,594       | 278/117,854      | 257/117,138      |      |
| Model 1                                                                          | 1            | 0.83 (0.70-0.99) | 0.91 (0.74-1.12) | 0.98 (0.82-1.17) | 0.93 (0.78-1.12) | 0.83 |
| Model 2                                                                          | 1            | 0.83 (0.69-0.99) | 0.91 (0.73-1.12) | 0.99 (0.82-1.18) | 0.94 (0.78-1.13) | 0.77 |
| <b>Early adulthood fruits and vegetables high in <math>\beta</math>-carotene</b> |              |                  |                  |                  |                  |      |
| All cases                                                                        |              |                  |                  |                  |                  |      |
| Median intake, serving/day                                                       | 0.2          | 0.5              | 0.7              | 1.1              | 1.7              |      |
| No. of cases/person-years                                                        | 641/378,689  | 628/371,209      | 667/384,657      | 618/374,046      | 681/376,140      |      |
| Model 1                                                                          | 1            | 0.98 (0.88-1.10) | 0.98 (0.88-1.10) | 0.93 (0.83-1.04) | 0.99 (0.89-1.10) | 0.70 |
| Model 2                                                                          | 1            | 0.96 (0.86-1.08) | 0.96 (0.86-1.07) | 0.90 (0.80-1.01) | 0.97 (0.86-1.09) | 0.52 |
| Premenopausal cases                                                              |              |                  |                  |                  |                  |      |
| Median intake, serving/day                                                       | 0.2          | 0.5              | 0.7              | 1.1              | 1.7              |      |
| No. of cases/person-years                                                        | 345/233,777  | 339/238,215      | 329/235,966      | 342/236,231      | 364/236,030      |      |
| Model 1                                                                          | 1            | 0.94 (0.81-1.09) | 0.89 (0.76-1.03) | 0.92 (0.79-1.07) | 0.95 (0.82-1.11) | 0.73 |
| Model 2                                                                          | 1            | 0.93 (0.80-1.08) | 0.88 (0.75-1.02) | 0.90 (0.77-1.05) | 0.93 (0.79-1.09) | 0.56 |
| Postmenopausal cases                                                             |              |                  |                  |                  |                  |      |
| Median intake, serving/day                                                       | 0.2          | 0.5              | 0.8              | 1.1              | 1.8              |      |
| No. of cases/person-years                                                        | 238/106,369  | 243/109,575      | 242/103,098      | 201/105,289      | 245/106,211      |      |
| Model 1                                                                          | 1            | 0.99 (0.82-1.18) | 1.02 (0.85-1.22) | 0.84 (0.69-1.01) | 0.99 (0.83-1.19) | 0.56 |
| Model 2                                                                          | 1            | 0.95 (0.80-1.14) | 1.00 (0.83-1.20) | 0.80 (0.66-0.97) | 0.96 (0.80-1.17) | 0.45 |
| <b>Early adulthood fruits and vegetables high in lutein</b>                      |              |                  |                  |                  |                  |      |
| All cases                                                                        |              |                  |                  |                  |                  |      |
| Median intake, serving/day                                                       | 0            | 0.07             | 0.1              | 0.4              |                  |      |
| No. of cases/person-years                                                        | 1209/726,243 | 874/497,346      | 871/491,972      | 281/167,844      |                  |      |
| Model 1                                                                          | 1            | 1.03 (0.94-1.12) | 1.02 (0.93-1.11) | 0.95 (0.83-1.08) |                  | 0.45 |
| Model 2                                                                          | 1            | 0.99 (0.91-1.08) | 0.98 (0.90-1.07) | 0.93 (0.82-1.07) |                  | 0.30 |
| Premenopausal cases                                                              |              |                  |                  |                  |                  |      |
| Median intake, serving/day                                                       | 0            | 0.07             | 0.1              | 0.4              |                  |      |
| No. of cases/person-years                                                        | 650/460,455  | 448/313,415      | 472/303,516      | 149/102,120      |                  |      |
| Model 1                                                                          | 1            | 0.96 (0.85-1.09) | 1.04 (0.92-1.17) | 0.97 (0.81-1.16) |                  | 0.97 |
| Model 2                                                                          | 1            | 0.94 (0.83-1.06) | 1.00 (0.88-1.12) | 0.93 (0.77-1.12) |                  | 0.55 |
| Postmenopausal cases                                                             |              |                  |                  |                  |                  |      |
| Median intake, serving/day                                                       | 0            | 0.07             | 0.1              | 0.4              |                  |      |
| No. of cases/person-years                                                        | 433/197,294  | 335/140,069      | 304/143,236      | 97/49,474        |                  |      |
| Model 1                                                                          | 1            | 1.08 (0.94-1.25) | 0.95 (0.82-1.10) | 0.87 (0.70-1.08) |                  | 0.12 |
| Model 2                                                                          | 1            | 1.05 (0.91-1.22) | 0.92 (0.79-1.08) | 0.86 (0.69-1.08) |                  | 0.12 |

Model 1 was stratified by age in months at the state of follow-up and calendar year of the current questionnaire cycle.

Model 2 was stratified by age in months at start of follow-up and calendar year of the current questionnaire cycle and was simultaneously adjusted for race (white, non-white), family history of breast cancer in mother or sisters (yes, no), history of benign breast disease (yes, no), smoking (never, past, current 1 to 14/day, current 15 to 24/day, current  $\geq 25$ /day), height (<62, 62 to <65, 65 to <68,  $\geq 68$  inches), BMI at age 18 years (<18.5, 18.5–<22.5, 22.5–<25, 25.0–<30,  $\geq 30.0$  kg/m<sup>2</sup>), weight change since age 18 (continuous, missing indicator), age at menarche (<12, 12, 13,  $\geq 14$  years), parity and age at first birth (nulliparous, parity  $\leq 2$  and age at first birth <25 years, parity  $\leq 2$  and age at first birth 25 to <30 years, parity  $\leq 2$  and age at first birth  $\geq 30$  years, parity 3 to 4 and age at first birth <25 years, parity 3 to 4 and age at first birth 25 to <30 years, parity 3 to 4 and age at first birth  $\geq 30$  years, parity  $\geq 5$  and age at first birth <25 years, parity  $\geq 5$  and age at first birth  $\geq 25$  years), oral contraceptive use (never, past, current), alcohol intake (nondrinker, <5, 5 to <15,  $\geq 15$  g/day), and energy (quintile). In postmenopausal women, we additionally adjusted for hormone use (postmenopausal never users, postmenopausal past users, postmenopausal current users), age at menopause (<45 years, 45 to 46 years, 47 to 48, 49 to 50 years, 51 to 52 years,  $\geq 53$  years). Among all women, we additionally adjusted for hormone use and menopausal status (premenopausal, postmenopausal never users, postmenopausal past users, postmenopausal current users, unknown menopausal status) and, age at menopause (premenopausal, unknown menopause, <45 years, 45 to 46 years, 47 to 48, 49 to 50 years, 51 to 52 years,  $\geq 53$  years).

**Table H. Hazard ratio (HR) and 95% confidence intervals (95% CI) for breast cancer according to tertile of intake of subgroups of fruit intake during early adulthood among women in the Nurses' Health Study II**

|                                            | Tertile of intake |                  |                  | <i>P</i> <sub>trend</sub> |
|--------------------------------------------|-------------------|------------------|------------------|---------------------------|
|                                            | 1                 | 2                | 3                |                           |
| <b>Early adulthood total citrus intake</b> |                   |                  |                  |                           |
| Median intake, serving/day                 | 0                 | 0.07             | 0.43             |                           |
| All cases                                  |                   |                  |                  |                           |
| No. of cases/person-years                  | 759/451,530       | 1502/874,328     | 972/557,428      |                           |
| Model 1                                    | 1                 | 1.01 (0.93-1.10) | 0.99 (0.90-1.09) | 0.63                      |
| Model 2                                    | 1                 | 1.01 (0.92-1.10) | 1.01 (0.91-1.11) | 0.99                      |
| Premenopausal cases                        |                   |                  |                  |                           |
| No. of cases/person-years                  | 390/280,183       | 809/553,748      | 519/345,442      |                           |
| Model 1                                    | 1                 | 1.02 (0.90-1.15) | 1.01 (0.88-1.15) | 0.93                      |
| Model 2                                    | 1                 | 1.03 (0.91-1.16) | 1.02 (0.89-1.18) | 0.88                      |
| Postmenopausal cases                       |                   |                  |                  |                           |
| No. of cases/person-years                  | 286/126,572       | 532/240,979      | 350/162,491      |                           |
| Model 1                                    | 1                 | 0.97 (0.84-1.12) | 0.93 (0.79-1.09) | 0.37                      |
| Model 2                                    | 1                 | 0.97 (0.83-1.12) | 0.95 (0.80-1.11) | 0.58                      |
| <b>Early adulthood berries intake</b>      |                   |                  |                  |                           |
| Median intake, serving/day                 | 0                 | 0.03             | 0.10             |                           |
| All cases                                  |                   |                  |                  |                           |
| No. of cases/person-years                  | 655/384,515       | 1338/793,572     | 1239/704,785     |                           |
| Model 1                                    | 1                 | 1.00 (0.91-1.10) | 1.03 (0.93-1.13) | 0.53                      |
| Model 2                                    | 1                 | 1.00 (0.91-1.10) | 1.02 (0.92-1.12) | 0.59                      |
| Premenopausal cases                        |                   |                  |                  |                           |
| No. of cases/person-years                  | 349/234,294       | 717/499,935      | 651/444,879      |                           |
| Model 1                                    | 1                 | 0.96 (0.85-1.09) | 0.95 (0.84-1.09) | 0.58                      |
| Model 2†                                   | 1                 | 0.98 (0.86-1.11) | 0.96 (0.84-1.10) | 0.57                      |
| Postmenopausal cases                       |                   |                  |                  |                           |
| No. of cases/person-years                  | 238/110,971       | 462/219,729      | 468/199,223      |                           |
| Model 1                                    | 1                 | 0.99 (0.85-1.16) | 1.10 (0.94-1.29) | 0.10                      |
| Model 2                                    | 1                 | 0.98 (0.84-1.15) | 1.10 (0.94-1.30) | 0.09                      |
| <b>Early adulthood pomes intake</b>        |                   |                  |                  |                           |
| Median intake, serving/day                 | 0.07              | 0.14             | 0.43             |                           |
| All cases                                  |                   |                  |                  |                           |
| No. of cases/person-years                  | 1203/689,818      | 753/438,858      | 1254/742,986     |                           |
| Model 1                                    | 1                 | 0.98 (0.89-1.07) | 0.95 (0.88-1.03) | 0.24                      |
| Model 2                                    | 1                 | 0.98 (0.89-1.08) | 0.96 (0.88-1.04) | 0.35                      |
| Premenopausal cases                        |                   |                  |                  |                           |
| No. of cases/person-years                  | 628/424,179       | 388/277,118      | 687/471,054      |                           |
| Model 1                                    | 1                 | 0.92 (0.81-1.04) | 0.94 (0.85-1.05) | 0.46                      |
| Model 2                                    | 1                 | 0.93 (0.82-1.06) | 0.96 (0.85-1.07) | 0.62                      |
| Postmenopausal cases                       |                   |                  |                  |                           |
| No. of cases/person-years                  | 431/196,846       | 281/122,547      | 449/207,022      |                           |
| Model 1                                    | 1                 | 1.05 (0.90-1.22) | 0.98 (0.86-1.12) | 0.64                      |
| Model 2                                    | 1                 | 1.06 (0.91-1.24) | 1.00 (0.87-1.15) | 0.78                      |
| <b>Early adulthood drupes intake</b>       |                   |                  |                  |                           |
| Median intake, serving/day                 | 0                 | 0.07             | 0.14             |                           |
| All cases                                  |                   |                  |                  |                           |
| No. of cases/person-years                  | 909/542,350       | 1180/669,713     | 1146/671,928     |                           |
| Model 1                                    | 1                 | 1.04 (0.95-1.13) | 1.00 (0.92-1.09) | 0.93                      |
| Model 2                                    | 1                 | 1.03 (0.94-1.12) | 1.01 (0.92-1.10) | 0.98                      |



|                                               |              |                  |                  |      |
|-----------------------------------------------|--------------|------------------|------------------|------|
| <b>Premenopausal cases</b>                    |              |                  |                  |      |
| No. of cases/person-years                     | 496/334,608  | 615/420,796      | 608/424,438      |      |
| Model 1                                       | 1            | 0.96 (0.85-1.08) | 0.93 (0.82-1.05) | 0.22 |
| Model 2                                       | 1            | 0.96 (0.85-1.08) | 0.93 (0.82-1.06) | 0.28 |
| <b>Postmenopausal cases</b>                   |              |                  |                  |      |
| No. of cases/person-years                     | 316/152,892  | 434/189,087      | 419/188,260      |      |
| Model 1                                       | 1            | 1.10 (0.95-1.28) | 1.08 (0.94-1.25) | 0.34 |
| Model 2                                       | 1            | 1.10 (0.95-1.28) | 1.10 (0.94-1.28) | 0.28 |
| <b>Early adulthood tropical fruits intake</b> |              |                  |                  |      |
| Median intake, serving/day                    | 0.07         | 0.14             | 0.43             |      |
| <b>All cases</b>                              |              |                  |                  |      |
| No. of cases/person-years                     | 1462/842,208 | 760/457,203      | 1000/576,087     |      |
| Model 1                                       | 1            | 0.97 (0.89-1.06) | 1.01 (0.93-1.10) | 0.68 |
| Model 2                                       | 1            | 0.97 (0.88-1.06) | 1.01 (0.93-1.10) | 0.67 |
| <b>Premenopausal cases</b>                    |              |                  |                  |      |
| No. of cases/person-years                     | 767/521,413  | 413/288,960      | 532/364,281      |      |
| Model 1                                       | 1            | 0.98 (0.87-1.10) | 0.99 (0.89-1.11) | 0.98 |
| Model 2                                       | 1            | 0.98 (0.87-1.11) | 1.00 (0.89-1.12) | 0.98 |
| <b>Postmenopausal cases</b>                   |              |                  |                  |      |
| No. of cases/person-years                     | 539/241,205  | 255/126,920      | 371/159,456      |      |
| Model 1                                       | 1            | 0.90 (0.78-1.05) | 1.05 (0.92-1.20) | 0.32 |
| Model 2                                       | 1            | 0.90 (0.77-1.05) | 1.05 (0.91-1.20) | 0.34 |
| <b>Early adulthood grapes intake</b>          |              |                  |                  |      |
| Median intake, serving/day                    | 0            | 0.07             | 0.14             |      |
| <b>All cases</b>                              |              |                  |                  |      |
| No. of cases/person-years                     | 1285/743,770 | 1187/696,924     | 755/438,415      |      |
| Model 1                                       | 1            | 0.99 (0.92-1.08) | 1.01 (0.92-1.10) | 0.87 |
| Model 2                                       | 1            | 0.98 (0.90-1.06) | 0.99 (0.90-1.09) | 0.80 |
| <b>Premenopausal cases</b>                    |              |                  |                  |      |
| No. of cases/person-years                     | 662/453,200  | 643/440,971      | 409/282,802      |      |
| Model 1                                       | 1            | 0.99 (0.88-1.10) | 0.97 (0.85-1.10) | 0.60 |
| Model 2                                       | 1            | 0.98 (0.88-1.09) | 0.96 (0.84-1.09) | 0.52 |
| <b>Postmenopausal cases</b>                   |              |                  |                  |      |
| No. of cases/person-years                     | 483/216,917  | 404/193,608      | 280/118,125      |      |
| Model 1                                       | 1            | 0.95 (0.83-1.08) | 1.09 (0.94-1.27) | 0.34 |
| Model 2                                       | 1            | 0.94 (0.82-1.08) | 1.08 (0.92-1.26) | 0.44 |
| <b>Early adulthood melon intake</b>           |              |                  |                  |      |
| Median intake, serving/day                    | 0            | 0.05             | 0.11             |      |
| <b>All cases</b>                              |              |                  |                  |      |
| No. of cases/person-years                     | 1026/615,853 | 1350/767,696     | 839/490,746      |      |
| Model 1                                       | 1            | 1.02 (0.94-1.11) | 0.97 (0.89-1.06) | 0.54 |
| Model 2                                       | 1            | 1.01 (0.93-1.10) | 0.98 (0.90-1.08) | 0.73 |
| <b>Premenopausal cases</b>                    |              |                  |                  |      |
| No. of cases/person-years                     | 549/388,195  | 714/483,168      | 446/302,782      |      |
| Model 1                                       | 1            | 1.00 (0.89-1.11) | 0.97 (0.86-1.10) | 0.67 |
| Model 2                                       | 1            | 0.99 (0.88-1.10) | 0.98 (0.86-1.11) | 0.74 |
| <b>Postmenopausal cases</b>                   |              |                  |                  |      |
| No. of cases/person-years                     | 363/166,718  | 498/216,456      | 298/143,903      |      |
| Model 1                                       | 1            | 1.03 (0.90-1.18) | 0.92 (0.79-1.07) | 0.28 |
| Model 2                                       | 1            | 1.02 (0.89-1.17) | 0.93 (0.79-1.08) | 0.33 |

Model 1 was stratified by age in months at the state of follow-up and calendar year of the current questionnaire cycle.

Model 2 was stratified by age in months at start of follow-up and calendar year of the current questionnaire cycle and was simultaneously adjusted for race (white, non-white), family history of breast cancer in mother or sisters (yes, no), history of benign breast disease (yes, no), smoking (never, past, current 1 to 14/day, current 15 to 24/day, current  $\geq 25$ /day), height (<62, 62 to <65, 65 to <68,  $\geq 68$  inches), BMI at age 18 years (<18.5, 18.5–<22.5, 22.5–<25, 25.0–<30,  $\geq 30.0$  kg/m<sup>2</sup>), weight change since age 18 (continuous, missing indicator), age at menarche (<12, 12, 13,  $\geq 14$  years), parity and age at first birth (nulliparous,

parity  $\leq 2$  and age at first birth  $< 25$  years, parity  $\leq 2$  and age at first birth 25 to  $< 30$  years, parity  $\leq 2$  and age at first birth  $\geq 30$  years, parity 3 to 4 and age at first birth  $< 25$  years, parity 3 to 4 and age at first birth 25 to  $< 30$  years, parity 3 to 4 and age at first birth  $\geq 30$  years, parity  $\geq 5$  and age at first birth  $< 25$  years, parity  $\geq 5$  and age at first birth  $\geq 25$  years), oral contraceptive use (never, past, current), alcohol intake (nondrinker,  $< 5$ , 5 to  $< 15$ ,  $\geq 15$  g/day), and energy (quintile). In postmenopausal women, we additionally adjusted for hormone use (postmenopausal never users, postmenopausal past users, postmenopausal current users), age at menopause ( $< 45$  years, 45 to 46 years, 47 to 48, 49 to 50 years, 51 to 52 years,  $\geq 53$  years). Among all women, we additionally adjusted for hormone use and menopausal status (premenopausal, postmenopausal never users, postmenopausal past users, postmenopausal current users, unknown menopausal status) and, age at menopause (premenopausal, unknown menopause,  $< 45$  years, 45 to 46 years, 47 to 48, 49 to 50 years, 51 to 52 years,  $\geq 53$  years).
